# Supplementary material
Source: PubMed Central journal article supplement (PMC3251639)
Supplement: NIHMS339354-supplement-2.pdf [file NIHMS339354-supplement-2.pdf]

**Table S1. Clinical characteristics of ccRCC tumors**

---

|                                       |       |
|---------------------------------------|-------|
| Sex                                   |       |
| Male                                  | 33    |
| Female                                | 14    |
| NA                                    | 7     |
| Age (in years)                        |       |
| Median                                | 60    |
| Range                                 | 31-86 |
| Clear cell histology                  | 54    |
| Tumor size (largest dimension, in cm) |       |
| Median                                | 6     |
| Range                                 | 2-14  |
| Stage at Diagnosis                    |       |
| I                                     | 25    |
| II                                    | 8     |
| III                                   | 16    |
| IV                                    | 1     |
| NA                                    | 4     |
| Grade at Diagnosis                    |       |
| 1                                     | 2     |
| 2                                     | 20    |
| 3                                     | 25    |
| 4                                     | 0     |
| NA                                    | 7     |

---

Grade is the Fuhrman grade of the tumor and Stage is from the TNM stage classification. NA - not available.

**Table S2. Genes determined to be gained and overexpressed in the Penn Data**

| Gene         | Segment                | Expression fold change |
|--------------|------------------------|------------------------|
| EEF1D        | 8_144719785_145348219  | 681                    |
| RPLP2        | 11_492013_1405948      | 286                    |
| VCAN         | 5_82429444_83404045    | 246                    |
| GTF2I        | 7_71542285_73758949    | 129                    |
| ATP6V0E1     | 5_171206830_172607425  | 96                     |
| EPB41L4A     | 5_111505154_111922638  | 88                     |
| AP3D1        | 19_1877027_2257574     | 72                     |
| HNRNPH1      | 5_178965094_179393918  | 70                     |
| HAVCR1       | 5_153318241_156728896  | 70                     |
| ELL2         | 5_95185578_96572060    | 68                     |
| ZFR          | 5_31825436_34192908    | 67                     |
| TPM4         | 19_15966270_17119827   | 67                     |
| ITGB8        | 7_20267666_20410154    | 62                     |
| PRRC1        | 5_126472912_127898523  | 60                     |
| CDH6         | 5_31118743_31275604    | 60                     |
| LOX          | 5_121379525_121463477  | 60                     |
| C5orf13      | 5_109028224_111491735  | 59                     |
| RAPGEF6      | 5_130783666_130814765  | 58                     |
| ERAP1        | 5_95185578_96572060    | 56                     |
| YTHDC2       | 5_112703850_113188388  | 47                     |
| SCAMP1       | 5_77424969_79064481    | 47                     |
| AP3B1        | 5_76396572_77394843    | 44                     |
| C7orf25      | 7_34509633_43546690    | 44                     |
| POLR3G       | 5_89715117_90038886    | 43                     |
| LOC100132832 | 7_75852517_76583054    | 43                     |
| RHEB         | 7_150769315_150816588  | 41                     |
| APC          | 5_111922639_112678649  | 39                     |
| GADD45B      | 19_2303639_2434712     | 37                     |
| AFF4         | 5_132093779_133869573  | 37                     |
| ST8SIA4      | 5_99896738_100307187   | 34                     |
| PRKAA1       | 5_38914975_40803153    | 34                     |
| CACNA2D1     | 7_79232817_81720844    | 33                     |
| SNX13        | 7_17701437_17798330    | 33                     |
| POLR2J4      | 7_43546691_44301066    | 32                     |
| SSBP2        | 5_80472997_80863775    | 31                     |
| CDC2L5       | 7_34509633_43546690    | 30                     |
| XRCC4        | 5_82377867_82413321    | 30                     |
| SLC36A1      | 5_150387976_151495148  | 29                     |
| UBE2I        | 16_37354_1504823       | 29                     |
| TMED2        | 12_121405862_124283213 | 27                     |
| HSPA4        | 5_132093779_133869573  | 26                     |
| ZCCHC10      | 5_132093779_133869573  | 24                     |
| G3BP1        | 5_150387976_151495148  | 24                     |
| FEM1C        | 5_114787094_117418456  | 23                     |

|           |                        |    |
|-----------|------------------------|----|
| PMS2L2    | 7_71542285_73758949    | 23 |
| TMCO6     | 5_137965436_142619254  | 22 |
| ZDHHC11   | 5_80564_1460115        | 22 |
| CD36      | 7_79232817_81720844    | 22 |
| KIAA0415  | 7_4443550_5856693      | 22 |
| PKD2L2    | 5_137033572_137695243  | 22 |
| SEMA3A    | 7_82670591_83502083    | 22 |
| CANX      | 5_178965094_179393918  | 21 |
| AEBP1     | 7_43546691_44301066    | 21 |
| SFRS8     | 12_130064055_132349534 | 21 |
| TCTN2     | 12_121405862_124283213 | 20 |
| LRRTM2    | 5_137965436_142619254  | 19 |
| LIFR      | 5_36083295_38914974    | 18 |
| FBXO38    | 5_147704279_148125330  | 18 |
| SLC1A3    | 5_36083295_38914974    | 18 |
| MCCC2     | 5_1464412_1547908      | 18 |
| PDGFA     | 7_295765_814722        | 17 |
| CNOT8     | 5_153318241_156728896  | 17 |
| FYB       | 5_38914975_40803153    | 17 |
| WWC1      | 5_167299915_168516543  | 17 |
| OCLN      | 5_80564_1460115        | 17 |
| FABP6     | 5_158186648_159550735  | 16 |
| LOC202181 | 5_175848855_177323654  | 16 |
| EDIL3     | 5_82429444_83404045    | 16 |
| AMACR     | 5_31825436_34192908    | 15 |
| LSM4      | 19_17510791_19739813   | 15 |
| NPR3      | 5_31825436_34192908    | 15 |
| NAIP      | 5_80564_1460115        | 15 |
| PMS2L3    | 7_74127825_75521516    | 15 |
| C16orf42  | 16_37354_1504823       | 14 |
| NPY6R     | 5_137033572_137695243  | 14 |
| NOP16     | 5_174398116_175825668  | 14 |
| HGF       | 7_79232817_81720844    | 13 |
| AURKA     | 20_54246466_54448572   | 13 |
| ZNF195    | 11_3335218_3349320     | 13 |
| RPS21     | 20_60211696_60452531   | 13 |
| OSMR      | 5_36083295_38914974    | 13 |
| NPM1      | 5_169013893_171206829  | 13 |
| SEMA3C    | 7_79232817_81720844    | 12 |
| CSNK1A1   | 5_148125331_149600863  | 12 |
| PDPK1     | 16_2497499_2582218     | 12 |
| NIPBL     | 5_36083295_38914974    | 12 |
| RNASEN    | 5_31379854_31520986    | 12 |
| SBNO1     | 12_121405862_124283213 | 12 |
| DHFR      | 5_79066094_80038105    | 12 |
| HSPA9     | 5_137741660_137923116  | 12 |
| POM121    | 7_71542285_73758949    | 12 |

|          |                       |    |
|----------|-----------------------|----|
| ANKHD1   | 5_137965436_142619254 | 12 |
| MAP1B    | 5_71090060_73266816   | 12 |
| KIR2DS5  | 19_217034_569158      | 12 |
| PGGT1B   | 5_113972101_114787065 | 12 |
| CETN3    | 5_89715117_90038886   | 12 |
| PSMA7    | 20_59810422_60201891  | 11 |
| TMED7    | 5_114787094_117418456 | 11 |
| ARL4A    | 7_12513732_13700054   | 11 |
| STK17A   | 7_43546691_44301066   | 11 |
| RAB22A   | 20_56098218_56737667  | 11 |
| WDR41    | 5_76396572_77394843   | 11 |
| PMS2     | 7_5894482_6154308     | 11 |
| SEMA6A   | 5_114787094_117418456 | 11 |
| XRCC2    | 7_151748390_155325075 | 10 |
| FAF2     | 5_174398116_175825668 | 10 |
| MCTP1    | 5_93800373_94108870   | 10 |
| NPTX2    | 7_97491747_98142731   | 10 |
| ETV1     | 7_13701250_13970996   | 10 |
| HUS1     | 7_45146403_49291382   | 9  |
| ATHL1    | 11_238181_280232      | 9  |
| PDIA4    | 7_148251514_148521023 | 9  |
| LPCAT1   | 5_1464412_1547908     | 9  |
| DMXL1    | 5_117428678_119347308 | 9  |
| SMN1     | 5_80564_1460115       | 9  |
| NR3C1    | 5_142619255_142995861 | 9  |
| DNAJB6   | 7_155325076_158821424 | 9  |
| DPY19L1  | 7_34509633_43546690   | 9  |
| TNPO1    | 5_71090060_73266816   | 9  |
| NUP155   | 5_36083295_38914974   | 8  |
| PRKAG2   | 7_150880365_151624640 | 8  |
| SAP30L   | 5_153318241_156728896 | 8  |
| SLC12A2  | 5_126472912_127898523 | 8  |
| TMEM106B | 7_10945597_12396012   | 8  |
| B4GALT7  | 5_175848855_177323654 | 8  |
| SKP2     | 5_36083295_38914974   | 8  |
| CARS     | 11_2353242_3198798    | 8  |
| TRIM52   | 5_179412778_180857866 | 8  |
| SERPINE1 | 7_99477381_101064053  | 8  |
| SNX2     | 5_121463478_122532464 | 8  |
| MFAP3    | 5_153318241_156728896 | 8  |
| MSH3     | 5_79066094_80038105   | 8  |
| STX16    | 20_56098218_56737667  | 8  |
| STC2     | 5_172627142_172911788 | 8  |
| RAE1     | 20_55323457_55373335  | 7  |
| BBS9     | 7_32770713_34509632   | 7  |
| SMAD5    | 5_133869574_135609557 | 7  |
| FAM153A  | 5_175848855_177323654 | 7  |

|         |                        |   |
|---------|------------------------|---|
| CDK10   | 16_86889141_88827254   | 7 |
| BAZ1B   | 7_71542285_73758949    | 7 |
| SETD8   | 12_121405862_124283213 | 7 |
| IK      | 5_137965436_142619254  | 7 |
| VPS41   | 7_34509633_43546690    | 7 |
| FBXW11  | 5_171206830_172607425  | 7 |
| EZH2    | 7_147743920_148251513  | 7 |
| CLK4    | 5_177541901_178236473  | 7 |
| ANKRD11 | 16_86889141_88827254   | 7 |
| INHBA   | 7_34509633_43546690    | 7 |
| SLMO2   | 20_56752189_57794009   | 7 |
| PRPF6   | 20_60513032_62435964   | 7 |
| FAM134B | 5_15838038_17095203    | 7 |
| PDCD6   | 5_80564_1460115        | 6 |
| KLHDC4  | 16_86213716_86327204   | 6 |
| SFXN1   | 5_174398116_175825668  | 6 |
| MEF2C   | 5_85233946_88114765    | 6 |
| AGGF1   | 5_75196222_76378584    | 6 |
| SPRY4   | 5_137965436_142619254  | 6 |
| TMED9   | 5_175848855_177323654  | 6 |
| LRRC17  | 7_102318547_102358948  | 6 |
| HSD17B4 | 5_117428678_119347308  | 6 |
| FPR3    | 19_56951383_57293210   | 6 |
| TSPAN13 | 7_16606140_17082725    | 6 |
| CYP3A5  | 7_98804470_99452248    | 6 |
| SLCO4C1 | 5_100368305_103112032  | 6 |
| RALA    | 7_34509633_43546690    | 6 |
| FAM169A | 5_74004814_74111113    | 6 |
| ZNF268  | 12_130064055_132349534 | 6 |
| RSRC2   | 12_121405862_124283213 | 6 |
| ZNF12   | 7_6174894_6908993      | 6 |
| FASTKD3 | 5_7595316_8756147      | 6 |
| IGFBP3  | 7_45146403_49291382    | 5 |
| YIPF5   | 5_142995862_144127403  | 5 |
| PMS2L11 | 7_75852517_76583054    | 5 |
| ANKLE2  | 12_130064055_132349534 | 5 |
| HN1L    | 16_1504824_1747780     | 5 |
| KIF3A   | 5_131895601_132064150  | 5 |
| VDAC1   | 5_132093779_133869573  | 5 |
| C5orf15 | 5_132093779_133869573  | 5 |
| CLTB    | 5_174398116_175825668  | 5 |
| LUC7L   | 16_37354_1504823       | 5 |
| TGFBI   | 5_133869574_135609557  | 5 |
| ATG12   | 5_114787094_117418456  | 5 |
| SRD5A1  | 5_6613041_6745052      | 5 |
| SNX24   | 5_121463478_122532464  | 5 |
| KIR2DS1 | 19_217034_569158       | 5 |

|              |                        |   |
|--------------|------------------------|---|
| BTF3         | 5_71090060_73266816    | 5 |
| RHOBTB3      | 5_94108871_95185577    | 5 |
| GM2A         | 5_150387976_151495148  | 5 |
| LNPEP        | 5_95185578_96572060    | 5 |
| TCERG1       | 5_145777678_145959815  | 5 |
| ARHGAP26     | 5_137965436_142619254  | 5 |
| ZNF205       | 16_3077262_3143035     | 5 |
| NSUN5B       | 7_74127825_75521516    | 5 |
| POP7         | 7_99477381_101064053   | 5 |
| WDR70        | 5_36083295_38914974    | 5 |
| GOLGA3       | 12_130064055_132349534 | 5 |
| ZNF350       | 19_56951383_57293210   | 5 |
| PNPLA2       | 11_492013_1405948      | 4 |
| C7orf26      | 7_6174894_6908993      | 4 |
| LOC100170939 | 5_80564_1460115        | 4 |
| DIDO1        | 20_60513032_62435964   | 4 |
| NUDT1        | 7_814723_2985487       | 4 |
| FOXF1        | 16_84978771_85883412   | 4 |
| TTC37        | 5_94108871_95185577    | 4 |
| ARSB         | 5_77424969_79064481    | 4 |
| MYOT         | 5_137033572_137695243  | 4 |
| C19orf6      | 19_685851_1501649      | 4 |
| LCP2         | 5_169013893_171206829  | 4 |
| UBE2D2       | 5_137965436_142619254  | 4 |
| FBN2         | 5_126472912_127898523  | 4 |
| ZNF140       | 12_130064055_132349534 | 4 |
| ERAP2        | 5_95185578_96572060    | 4 |
| GTF2H2       | 5_80564_1460115        | 4 |
| THG1L        | 5_156728897_158181852  | 4 |
| WDR60        | 7_155325076_158821424  | 4 |
| WIPI2        | 7_4443550_5856693      | 4 |
| APRT         | 16_86889141_88827254   | 4 |
| GCNT4        | 5_74111114_74971580    | 4 |
| MPHOSPH9     | 12_121405862_124283213 | 4 |
| CAST         | 5_95185578_96572060    | 4 |
| YTHDF1       | 20_60513032_62435964   | 4 |
| BRD8         | 5_137033572_137695243  | 4 |
| NDUFS6       | 5_1819736_3580763      | 4 |
| ICA1         | 7_8116121_8299179      | 4 |
| MYO10        | 5_15838038_17095203    | 4 |
| CSNK1G3      | 5_122532465_123412098  | 4 |
| ADCY2        | 5_6955045_7595315      | 4 |
| TRRAP        | 7_98142732_98539906    | 4 |
| PPIC         | 5_121463478_122532464  | 4 |
| GABRA1       | 5_160850531_161385662  | 4 |
| RBM22        | 5_149608837_150339149  | 4 |
| GTF2H2B      | 5_80564_1460115        | 4 |

|          |                        |   |
|----------|------------------------|---|
| MED7     | 5_153318241_156728896  | 4 |
| GNAI1    | 7_79232817_81720844    | 4 |
| MTRR     | 5_7595316_8756147      | 4 |
| SKP1     | 5_132093779_133869573  | 4 |
| FTSJ2    | 7_814723_2985487       | 4 |
| NFIC     | 19_3207206_3806976     | 4 |
| MKNK2    | 19_1877027_2257574     | 4 |
| GIN1     | 5_100368305_103112032  | 4 |
| LECT2    | 5_133869574_135609557  | 4 |
| MUM1     | 19_685851_1501649      | 4 |
| ABCF2    | 7_150298143_150766389  | 3 |
| SRP19    | 5_111922639_112678649  | 3 |
| UBE2B    | 5_132093779_133869573  | 3 |
| STX2     | 12_129659406_130053993 | 3 |
| CDK2AP1  | 12_121405862_124283213 | 3 |
| ABLIM3   | 5_148125331_149600863  | 3 |
| CHD1     | 5_98143728_99896737    | 3 |
| ZNF354A  | 5_177541901_178236473  | 3 |
| PURA     | 5_137965436_142619254  | 3 |
| ZMIZ2    | 7_44393674_44926447    | 3 |
| SF4      | 19_17510791_19739813   | 3 |
| C7orf28A | 7_5894482_6154308      | 3 |
| TCF25    | 16_86889141_88827254   | 3 |
| ADAM19   | 5_156728897_158181852  | 3 |
| ZFYVE16  | 5_79066094_80038105    | 3 |
| HAPLN1   | 5_82429444_83404045    | 3 |
| GNAS     | 20_56752189_57794009   | 3 |
| CUL1     | 7_147743920_148251513  | 3 |
| CTSZ     | 20_56752189_57794009   | 3 |
| RASA1    | 5_85233946_88114765    | 3 |
| PMCHL1   | 5_18839558_22719712    | 3 |
| HARS2    | 5_137965436_142619254  | 3 |
| GRB10    | 7_49804234_51368211    | 3 |
| ZNF84    | 12_130064055_132349534 | 3 |
| RNF14    | 5_137965436_142619254  | 3 |
| ZNF394   | 7_98804470_99452248    | 3 |
| SNRNP35  | 12_121405862_124283213 | 3 |
| TNFAIP8  | 5_117428678_119347308  | 3 |
| INSIG1   | 7_151748390_155325075  | 3 |
| VPS33A   | 12_120868840_121368593 | 3 |
| ALDH7A1  | 5_124312152_126219449  | 3 |
| HEXB     | 5_74004814_74111113    | 3 |
| TCF3     | 19_1531334_1876941     | 3 |
| TRIO     | 5_13360088_14372070    | 3 |
| PDLIM4   | 5_131528076_131643864  | 3 |
| ZNF10    | 12_130064055_132349534 | 3 |
| CCNJL    | 5_159560586_159794152  | 3 |

|          |                        |   |
|----------|------------------------|---|
| ARL6IP4  | 12_121405862_124283213 | 3 |
| MAPK9    | 5_179412778_180857866  | 3 |
| NCAPG2   | 7_155325076_158821424  | 3 |
| ABCA3    | 16_2203147_2269261     | 3 |
| AHR      | 7_17204515_17372242    | 3 |
| CTNNA1   | 5_137965436_142619254  | 3 |
| DEF8     | 16_86889141_88827254   | 3 |
| SAR1B    | 5_133869574_135609557  | 3 |
| SYNPO    | 5_149608837_150339149  | 3 |
| TTC33    | 5_38914975_40803153    | 3 |
| ZNF3     | 7_99477381_101064053   | 3 |
| KBTBD2   | 7_32770713_34509632    | 3 |
| C19orf24 | 19_685851_1501649      | 3 |
| LHFPL2   | 5_77424969_79064481    | 3 |
| GTPBP3   | 19_17140752_17510790   | 3 |
| CKMT2    | 5_80472997_80863775    | 3 |
| PCDHGB5  | 5_137965436_142619254  | 3 |
| CLIP1    | 12_120868840_121368593 | 3 |
| DAB2     | 5_38914975_40803153    | 3 |
| RNF126   | 19_580303_681234       | 3 |
| DENR     | 12_121405862_124283213 | 3 |
| BIRC7    | 20_60513032_62435964   | 3 |
| HINT1    | 5_130446033_130549011  | 3 |
| TARP     | 7_34509633_43546690    | 3 |
| PPIA     | 7_44393674_44926447    | 3 |
| C5orf4   | 5_153318241_156728896  | 3 |
| SFRS14   | 19_17510791_19739813   | 3 |
| CREBBP   | 16_3703180_3938630     | 3 |
| HNRNPA0  | 5_137033572_137695243  | 3 |
| TWIST1   | 7_19115372_19389587    | 3 |
| PTCD1    | 7_98804470_99452248    | 2 |
| TARS     | 5_31825436_34192908    | 2 |
| FAM172A  | 5_92130734_93021232    | 2 |
| POLR2J2  | 7_101853878_102303979  | 2 |
| AOAH     | 7_34509633_43546690    | 2 |
| TCOF1    | 5_149608837_150339149  | 2 |
| IL7R     | 5_35072475_35904253    | 2 |
| LMTK2    | 7_97491747_98142731    | 2 |
| TICAM1   | 19_4383973_5333471     | 2 |
| PSMD13   | 11_188510_237985       | 2 |
| USE1     | 19_17140752_17510790   | 2 |
| CD74     | 5_149608837_150339149  | 2 |
| F2R      | 5_75196222_76378584    | 2 |
| FER      | 5_107885704_108507649  | 2 |
| GALNT10  | 5_153318241_156728896  | 2 |
| FLJ11235 | 5_111505154_111922638  | 2 |
| ZNF434   | 16_3143036_3553004     | 2 |



|          |                        |   |
|----------|------------------------|---|
| GRAMD3   | 5_124312152_126219449  | 2 |
| CNOT6    | 5_179412778_180857866  | 2 |
| MRPS27   | 5_71090060_73266816    | 2 |
| KIAA0947 | 5_4811455_5909814      | 2 |
| GAL3ST4  | 7_99477381_101064053   | 2 |
| PTTG1    | 5_159560586_159794152  | 2 |
| GNA12    | 7_814723_2985487       | 2 |
| PMEPA1   | 20_55378086_56088765   | 2 |
| THSD7A   | 7_10945597_12396012    | 2 |
| GNG7     | 19_2439172_2475684     | 2 |
| FAM114A2 | 5_153318241_156728896  | 2 |
| C9       | 5_38914975_40803153    | 2 |
| SLC22A5  | 5_131643865_131833633  | 2 |
| LMNB1    | 5_124312152_126219449  | 2 |
| SNCAIP   | 5_121463478_122532464  | 2 |
| ZNF783   | 7_148544578_149115991  | 2 |
| AP3S1    | 5_114787094_117418456  | 2 |
| ZCCHC8   | 12_121405862_124283213 | 2 |
| TBXA2R   | 19_3207206_3806976     | 2 |
| DIAPH1   | 5_137965436_142619254  | 2 |
| DDX49    | 19_17510791_19739813   | 2 |
| BLVRA    | 7_43546691_44301066    | 2 |
| GALNT11  | 7_150880365_151624640  | 2 |
| EFNA5    | 5_106017378_107620202  | 2 |

---

**Table S3. Genes determined to be lost and underexpressed in the Penn Data**

| <b>Gene</b> | <b>Segment</b>         | <b>Expression<br/>fold change</b> |
|-------------|------------------------|-----------------------------------|
| ALDOB       | 9_103206143_103225078  | 1070                              |
| ALDH6A1     | 14_73538366_75214580   | 227                               |
| UQCRC1      | 3_44897145_49188640    | 170                               |
| SLC7A8      | 14_22048600_22665560   | 128                               |
| ACY1        | 3_49220649_53001753    | 120                               |
| SERPINA5    | 14_91904853_94123764   | 116                               |
| PTH1R       | 3_44897145_49188640    | 93                                |
| ASS1        | 9_132265469_132463966  | 91                                |
| FBP1        | 9_95018086_97600430    | 79                                |
| GLDC        | 9_5171467_6962164      | 72                                |
| FOS         | 14_73538366_75214580   | 63                                |
| PLG         | 6_159653684_161058906  | 52                                |
| ADD3        | 10_111599600_112749597 | 52                                |
| NP          | 14_19722395_21117922   | 47                                |
| RGS3        | 9_115037070_115782034  | 44                                |
| LPA         | 6_159653684_161058906  | 36                                |
| DCTN3       | 9_34490610_35516604    | 34                                |
| DALRD3      | 3_44897145_49188640    | 33                                |
| ACOX2       | 3_58186123_58682005    | 31                                |
| KIAA0284    | 14_103638225_104746745 | 31                                |
| MPDZ        | 9_13054793_13313467    | 30                                |
| AMT         | 3_49220649_53001753    | 29                                |
| TM9SF1      | 14_23452745_23973123   | 29                                |
| P4HTM       | 3_44897145_49188640    | 28                                |
| NR4A3       | 9_101056712_102392837  | 26                                |
| PABPN1      | 14_22668792_23199978   | 26                                |
| PTPN3       | 9_110686804_112024713  | 25                                |
| PLAU        | 10_73715923_76042042   | 25                                |
| SLC1A1      | 9_4428585_4696365      | 24                                |
| ACOT1       | 14_72413330_73197695   | 24                                |
| DHRS4       | 14_23452745_23973123   | 23                                |
| SF3B5       | 6_144123302_144707049  | 23                                |
| SUCLG2      | 3_66911946_67923826    | 23                                |
| CLEC3B      | 3_44897145_49188640    | 22                                |
| CISH        | 3_49220649_53001753    | 22                                |
| FKBP15      | 9_114950812_115037069  | 21                                |
| CAMK2G      | 10_73715923_76042042   | 21                                |
| GPX1        | 3_49220649_53001753    | 20                                |
| UNC13B      | 9_34490610_35516604    | 20                                |
| SPTAN1      | 9_130329421_131084190  | 20                                |
| FBLN5       | 14_91313036_91496974   | 20                                |
| DHRS1       | 14_23452745_23973123   | 20                                |
| SDR39U1     | 14_23973124_24015170   | 20                                |
| NISCH       | 3_49220649_53001753    | 19                                |

|           |                        |    |
|-----------|------------------------|----|
| PRKAR2A   | 3_44897145_49188640    | 19 |
| RNASE1    | 14_19722395_21117922   | 19 |
| TBC1D13   | 9_130329421_131084190  | 19 |
| AQP3      | 9_33069023_34267052    | 18 |
| TNFAIP2   | 14_100344336_102698490 | 18 |
| RNF123    | 3_49220649_53001753    | 17 |
| CCDC51    | 3_44897145_49188640    | 17 |
| FAM102A   | 9_129662767_130209348  | 17 |
| PLXNB1    | 3_44897145_49188640    | 17 |
| CRAT      | 9_130329421_131084190  | 17 |
| THTPA     | 14_22668792_23199978   | 17 |
| C14orf159 | 14_90234219_91313035   | 17 |
| LMBRD1    | 6_70369272_70785392    | 17 |
| KIAA0913  | 10_73715923_76042042   | 17 |
| SCAP      | 3_44897145_49188640    | 17 |
| C9orf16   | 9_129662767_130209348  | 17 |
| IFRD2     | 3_49220649_53001753    | 16 |
| MYD88     | 3_37967544_38537395    | 16 |
| TMEM30B   | 14_60386017_61188235   | 16 |
| XPC       | 3_12915346_14322584    | 16 |
| MTHFD1    | 14_63745851_64141947   | 16 |
| RPL29     | 3_49220649_53001753    | 16 |
| PSAT1     | 9_79879810_80205963    | 16 |
| VGLL4     | 3_11040807_12450087    | 16 |
| RBM23     | 14_22048600_22665560   | 16 |
| CTNNAL1   | 9_110686804_112024713  | 16 |
| SLC7A7    | 14_22048600_22665560   | 15 |
| NTRK2     | 9_85941187_87593031    | 15 |
| CKB       | 14_102698491_103162541 | 15 |
| BAP1      | 3_49220649_53001753    | 15 |
| HSPA2     | 14_63745851_64141947   | 15 |
| ACO1      | 9_32372071_32379397    | 15 |
| MST1      | 3_49220649_53001753    | 15 |
| VCP       | 9_34490610_35516604    | 15 |
| WBSCR16   | 7_73758950_74127824    | 15 |
| RABEPK    | 9_126751142_127009605  | 14 |
| PRMT5     | 14_22048600_22665560   | 14 |
| ALS2CL    | 3_44897145_49188640    | 14 |
| LRP10     | 14_22048600_22665560   | 14 |
| IFI27     | 14_91904853_94123764   | 14 |
| APEH      | 3_49220649_53001753    | 14 |
| CRIP2     | 14_104761137_106356481 | 14 |
| KLF4      | 9_108878798_110682355  | 14 |
| CTDSPL    | 3_37419138_37957464    | 14 |
| TKT       | 3_53179885_54098050    | 13 |
| ABL1      | 9_132476485_132985779  | 13 |
| CDC14B    | 9_97608364_98577589    | 13 |

|          |                        |    |
|----------|------------------------|----|
| SLC25A20 | 3_44897145_49188640    | 13 |
| SETD5    | 3_9287536_9531913      | 13 |
| ALAS1    | 3_49220649_53001753    | 13 |
| CNIH     | 14_53873515_54481493   | 13 |
| TCF21    | 6_133557295_134979912  | 13 |
| CITED2   | 6_139666937_140225385  | 13 |
| IMPDH2   | 3_44897145_49188640    | 12 |
| ENDOG    | 9_130329421_131084190  | 12 |
| C14orf45 | 14_73538366_75214580   | 12 |
| EXOSC7   | 3_44897145_49188640    | 12 |
| NINJ1    | 9_94395540_95002934    | 12 |
| NDRG2    | 14_19722395_21117922   | 12 |
| WARS     | 14_99602955_100344335  | 12 |
| ALDH8A1  | 6_134990236_136274372  | 12 |
| DUSP5    | 10_111599600_112749597 | 12 |
| TUSC2    | 3_49220649_53001753    | 12 |
| CREB3    | 9_35523348_37085007    | 12 |
| KIAA1539 | 9_34490610_35516604    | 12 |
| SEC24C   | 10_73715923_76042042   | 12 |
| URM1     | 9_129662767_130209348  | 12 |
| TRMT61A  | 14_102698491_103162541 | 12 |
| DLST     | 14_73538366_75214580   | 11 |
| PLCD1    | 3_37967544_38537395    | 11 |
| SEMA3B   | 3_49220649_53001753    | 11 |
| DNAJC12  | 10_69061112_69234950   | 11 |
| AKT1     | 14_103638225_104746745 | 11 |
| ABHD4    | 14_22048600_22665560   | 11 |
| CRTAP    | 3_30861158_34026328    | 11 |
| FAM107A  | 3_58186123_58682005    | 11 |
| TUSC4    | 3_49220649_53001753    | 11 |
| TYRP1    | 9_12500515_12697860    | 11 |
| CLMN     | 14_94128490_96240501   | 11 |
| PNN      | 14_38425213_39179815   | 11 |
| SNX3     | 6_107556334_108718558  | 11 |
| PLEKHG3  | 14_64141948_64362422   | 11 |
| TCTA     | 3_49220649_53001753    | 10 |
| C14orf1  | 14_73538366_75214580   | 10 |
| MAP3K4   | 6_161064719_162208527  | 10 |
| SLC25A38 | 3_39227673_39883848    | 10 |
| ZER1     | 9_130329421_131084190  | 10 |
| PEX7     | 6_136867990_137635448  | 10 |
| IFIT3    | 10_90957073_91340766   | 10 |
| CDC2L6   | 6_109168061_112756362  | 10 |
| BAG5     | 14_102698491_103162541 | 10 |
| ARPC4    | 3_9737595_11040806     | 10 |
| GSTZ1    | 14_75364277_77059690   | 10 |
| GOLGA4   | 3_36902550_37385707    | 10 |

|          |                        |   |
|----------|------------------------|---|
| BSPRY    | 9_115037070_115782034  | 9 |
| PRKCH    | 14_60386017_61188235   | 9 |
| DNAJB12  | 10_73715923_76042042   | 9 |
| HDHD3    | 9_115037070_115782034  | 9 |
| RAB15    | 14_64373004_64780332   | 9 |
| HGD      | 3_38411_124196         | 9 |
| CDC42BPB | 14_100344336_102698490 | 9 |
| KIAA0391 | 14_34641402_35194085   | 9 |
| GRHPR    | 9_37085008_38426991    | 9 |
| DOLPP1   | 9_130329421_131084190  | 9 |
| CTSL2    | 9_98591458_99015826    | 9 |
| DHX30    | 3_44897145_49188640    | 9 |
| PCK2     | 14_23452745_23973123   | 9 |
| CLTA     | 9_35523348_37085007    | 9 |
| ABHD14A  | 3_49220649_53001753    | 9 |
| C9orf46  | 9_5171467_6962164      | 9 |
| PCDH9    | 13_64096146_68147927   | 9 |
| SALL2    | 14_19722395_21117922   | 9 |
| TCTN3    | 10_95422852_97564644   | 9 |
| GNA14    | 9_78471939_79873671    | 9 |
| DAG1     | 3_49220649_53001753    | 8 |
| ACTR10   | 14_57676004_58185200   | 8 |
| RDH11    | 14_66925080_67888728   | 8 |
| NOL6     | 9_33069023_34267052    | 8 |
| PPP2R4   | 9_130329421_131084190  | 8 |
| ZNF410   | 14_73238184_73538365   | 8 |
| MTMR14   | 3_9531914_9737594      | 8 |
| GMPR2    | 14_23452745_23973123   | 8 |
| PSEN1    | 14_72413330_73197695   | 8 |
| TPD52L1  | 6_124730454_126264765  | 8 |
| CCNB1IP1 | 14_19722395_21117922   | 8 |
| IP6K1    | 3_49220649_53001753    | 8 |
| TRAK1    | 3_40062985_42196550    | 8 |
| NDUFA8   | 9_122162008_124248881  | 8 |
| TADA3L   | 3_9737595_11040806     | 8 |
| ATP6V1G1 | 9_116327990_116400549  | 8 |
| PDHB     | 3_58186123_58682005    | 8 |
| AQP7     | 9_33069023_34267052    | 8 |
| ACTN1    | 14_68301617_69955784   | 8 |
| DAD1     | 14_22048600_22665560   | 8 |
| C3orf14  | 3_61813487_62538927    | 8 |
| UBAP2    | 9_33069023_34267052    | 8 |
| ABHD6    | 3_58186123_58682005    | 8 |
| PSMB5    | 14_22048600_22665560   | 8 |
| AHSA1    | 14_75364277_77059690   | 8 |
| C9orf95  | 9_76597456_77301249    | 7 |
| SETX     | 9_134112253_134217401  | 7 |

|           |                        |   |
|-----------|------------------------|---|
| IL17RC    | 3_9737595_11040806     | 7 |
| MLH1      | 3_36902550_37385707    | 7 |
| WDR48     | 3_38618283_39223855    | 7 |
| BTD       | 3_15026132_16085669    | 7 |
| IRF9      | 14_23452745_23973123   | 7 |
| GORASP1   | 3_38618283_39223855    | 7 |
| EPB41L4B  | 9_110686804_112024713  | 7 |
| ANGEL1    | 14_75364277_77059690   | 7 |
| PSMB1     | 6_168703401_170899992  | 7 |
| ACAA1     | 3_37967544_38537395    | 7 |
| ZBTB5     | 9_37085008_38426991    | 7 |
| SPCS1     | 3_49220649_53001753    | 7 |
| SFRS5     | 14_68301617_69955784   | 7 |
| PSME1     | 14_23452745_23973123   | 7 |
| HYAL2     | 3_49220649_53001753    | 7 |
| TFG       | 3_101331030_102077329  | 7 |
| KTN1      | 14_55049506_57672302   | 7 |
| RPS12     | 6_132861486_133539012  | 7 |
| GPC5      | 13_90843580_90863093   | 7 |
| AMIGO3    | 3_49220649_53001753    | 7 |
| C14orf109 | 14_91904853_94123764   | 7 |
| BDKRB2    | 14_94128490_96240501   | 7 |
| MITF      | 3_68763613_70127023    | 7 |
| ZDHHC6    | 10_114129886_115474189 | 7 |
| C14orf101 | 14_55049506_57672302   | 7 |
| INF2      | 14_103638225_104746745 | 7 |
| DNM1      | 9_129662767_130209348  | 6 |
| TUSC3     | 8_15342886_15447306    | 6 |
| STXBP1    | 9_128580791_129662766  | 6 |
| ARG2      | 14_66925080_67888728   | 6 |
| NFX1      | 9_33069023_34267052    | 6 |
| SECISBP2  | 9_90961462_92068821    | 6 |
| DOLK      | 9_130329421_131084190  | 6 |
| ANXA2P2   | 9_33069023_34267052    | 6 |
| ANKRD28   | 3_15026132_16085669    | 6 |
| ECM2      | 9_93727422_94324032    | 6 |
| COX16     | 14_68301617_69955784   | 6 |
| DPM2      | 9_129662767_130209348  | 6 |
| MRPS16    | 10_73715923_76042042   | 6 |
| MUDENG    | 14_55049506_57672302   | 6 |
| IL17RB    | 3_53179885_54098050    | 6 |
| ZDHHC3    | 3_44897145_49188640    | 6 |
| ERH       | 14_68301617_69955784   | 6 |
| SYNJ2     | 6_157357403_158508689  | 6 |
| DNASE1L3  | 3_57884298_58173754    | 6 |
| CBARA1    | 10_73715923_76042042   | 6 |
| AKAP12    | 6_150013780_151967069  | 6 |

|         |                        |   |
|---------|------------------------|---|
| GPD1L   | 3_30861158_34026328    | 6 |
| SMARCC1 | 3_44897145_49188640    | 6 |
| AMN     | 14_100344336_102698490 | 6 |
| COQ4    | 9_129662767_130209348  | 6 |
| RPS29   | 14_48594272_49275522   | 6 |
| VPS26A  | 10_70445087_70565148   | 6 |
| SLC26A6 | 3_44897145_49188640    | 6 |
| C3orf18 | 3_49220649_53001753    | 6 |
| REC8    | 14_23452745_23973123   | 6 |
| HYAL1   | 3_49220649_53001753    | 6 |
| EIF1B   | 3_40062985_42196550    | 6 |
| DYNC1H1 | 14_100344336_102698490 | 6 |
| ABCA1   | 9_106576716_106585723  | 6 |
| GOLGA1  | 9_126285350_126728434  | 6 |
| SYNE2   | 14_62827859_63745850   | 6 |
| PBRM1   | 3_49220649_53001753    | 5 |
| OXSM    | 3_25209537_27205590    | 5 |
| AKAP7   | 6_130174709_131753350  | 5 |
| USP4    | 3_49220649_53001753    | 5 |
| POMT1   | 9_132994733_133426100  | 5 |
| SMARCA2 | 9_1477108_2200546      | 5 |
| OGG1    | 3_9737595_11040806     | 5 |
| PRPF4   | 9_115037070_115782034  | 5 |
| KLHDC2  | 14_49275523_49764448   | 5 |
| TMED10  | 14_73538366_75214580   | 5 |
| RNASE4  | 14_19722395_21117922   | 5 |
| FAM179B | 14_43988150_44610615   | 5 |
| PDCD6IP | 3_30861158_34026328    | 5 |
| DENND4C | 9_19280143_19432557    | 5 |
| SIVA1   | 14_103638225_104746745 | 5 |
| NFKBIA  | 14_34641402_35194085   | 5 |
| RBM5    | 3_49220649_53001753    | 5 |
| STAB1   | 3_49220649_53001753    | 5 |
| GOLGA2  | 9_129662767_130209348  | 5 |
| KLC1    | 14_103162542_103218091 | 5 |
| PNMA1   | 14_73238184_73538365   | 5 |
| GLT8D1  | 3_49220649_53001753    | 5 |
| VNN1    | 6_132861486_133539012  | 5 |
| TMEM111 | 3_9737595_11040806     | 5 |
| PIP5K1B | 9_70233709_71617302    | 5 |
| RAB14   | 9_122162008_124248881  | 5 |
| RBM15B  | 3_49220649_53001753    | 5 |
| C9orf3  | 9_95018086_97600430    | 5 |
| ATP6V1D | 14_66874128_66925079   | 5 |
| RYBP    | 3_72415298_72722483    | 5 |
| PCBP4   | 3_49220649_53001753    | 5 |
| C5      | 9_122162008_124248881  | 5 |

|          |                        |   |
|----------|------------------------|---|
| AIM1     | 6_107027893_107082228  | 5 |
| TRPM3    | 9_71621900_72807090    | 5 |
| ALKBH1   | 14_77059691_77387656   | 5 |
| RAF1     | 3_12450088_12836607    | 5 |
| SET      | 9_130329421_131084190  | 5 |
| FAM184A  | 6_117963452_119451227  | 5 |
| NDUFB6   | 9_32492525_32566996    | 5 |
| FYN      | 6_109168061_112756362  | 5 |
| RHOA     | 3_49220649_53001753    | 5 |
| TEX264   | 3_49220649_53001753    | 5 |
| ACIN1    | 14_22048600_22665560   | 5 |
| COL7A1   | 3_44897145_49188640    | 5 |
| AUH      | 9_92877674_93702294    | 5 |
| RRAGD    | 6_89266711_90133403    | 5 |
| BCL2L2   | 14_22668792_23199978   | 5 |
| POLE3    | 9_115037070_115782034  | 5 |
| NIT2     | 3_101331030_102077329  | 5 |
| CYB561D2 | 3_49220649_53001753    | 4 |
| LAMC3    | 9_132476485_132985779  | 4 |
| PTGES2   | 9_129662767_130209348  | 4 |
| PARP2    | 14_19722395_21117922   | 4 |
| GNE      | 9_35523348_37085007    | 4 |
| NDST2    | 10_73715923_76042042   | 4 |
| MAPKAPK3 | 3_49220649_53001753    | 4 |
| BRP44L   | 6_165958177_167074864  | 4 |
| PACS2    | 14_104761137_106356481 | 4 |
| BAT2L    | 9_132994733_133426100  | 4 |
| NCKIPSD  | 3_44897145_49188640    | 4 |
| JAG2     | 14_103638225_104746745 | 4 |
| BBX      | 3_108162609_109014758  | 4 |
| DHRS7    | 14_59453438_60386016   | 4 |
| AKAP2    | 9_110686804_112024713  | 4 |
| FBXL2    | 3_30861158_34026328    | 4 |
| HEMK1    | 3_49220649_53001753    | 4 |
| TRIM14   | 9_99772623_100853326   | 4 |
| TDGF1    | 3_44897145_49188640    | 4 |
| SMPD2    | 6_109168061_112756362  | 4 |
| FIG4     | 6_109168061_112756362  | 4 |
| ZNF839   | 14_100344336_102698490 | 4 |
| CSTF2T   | 10_53011959_53138030   | 4 |
| VTI1B    | 14_66925080_67888728   | 4 |
| DDX24    | 14_91904853_94123764   | 4 |
| PDE10A   | 6_164518210_165829451  | 4 |
| RUSC2    | 9_34490610_35516604    | 4 |
| SUPT16H  | 14_19722395_21117922   | 4 |
| PARP3    | 3_49220649_53001753    | 4 |
| GAS1     | 9_87649884_89304565    | 4 |



|          |                        |   |
|----------|------------------------|---|
| BNC2     | 9_16201320_16405035    | 4 |
| GLRX5    | 14_94128490_96240501   | 4 |
| AP1G2    | 14_22668792_23199978   | 4 |
| TJP2     | 9_70233709_71617302    | 4 |
| SASH1    | 6_148191120_148971559  | 4 |
| TMEM115  | 3_49220649_53001753    | 4 |
| ISCA1    | 9_87649884_89304565    | 4 |
| RALGPS1  | 9_128580791_129662766  | 4 |
| BHLHE40  | 3_4640228_5379903      | 4 |
| TDP1     | 14_88531099_90228621   | 4 |
| PBLD     | 10_69653133_69738802   | 4 |
| KIAA0317 | 14_73538366_75214580   | 4 |
| FLJ10357 | 14_19722395_21117922   | 4 |
| ARHGAP5  | 14_31415386_32765672   | 4 |
| TBC1D5   | 3_16875185_17188360    | 4 |
| MTA1     | 14_104761137_106356481 | 4 |
| ARF6     | 14_49275523_49764448   | 4 |
| BAG1     | 9_33069023_34267052    | 4 |
| XPNPEP1  | 10_111599600_112749597 | 4 |
| PSMD6    | 3_63284090_64030540    | 4 |
| RNGTT    | 6_89266711_90133403    | 4 |
| GLB1     | 3_30861158_34026328    | 4 |
| NBEAL2   | 3_44897145_49188640    | 4 |
| CDC40    | 6_109168061_112756362  | 4 |
| NR1D2    | 3_23001825_24269384    | 4 |
| BRF1     | 14_103638225_104746745 | 4 |
| FLRT2    | 14_84926602_85186475   | 4 |
| ATRIP    | 3_44897145_49188640    | 4 |
| EEF1A1   | 6_74266790_74286512    | 4 |
| FRMD4B   | 3_68763613_70127023    | 4 |
| FBXO34   | 14_54579863_55048577   | 4 |
| SH3GL2   | 9_16855699_17606192    | 4 |
| STOML2   | 9_34490610_35516604    | 4 |
| KIAA0020 | 9_2559655_2952417      | 4 |
| SRGN     | 10_70445087_70565148   | 4 |
| QRSL1    | 6_107087017_107515277  | 4 |
| TEK      | 9_26297529_27664431    | 4 |
| MEGF9    | 9_122162008_124248881  | 4 |
| ADK      | 10_73715923_76042042   | 4 |
| SETD2    | 3_44897145_49188640    | 4 |
| PIGH     | 14_66925080_67888728   | 4 |
| ALDH18A1 | 10_95422852_97564644   | 4 |
| CCNC     | 6_97422999_100838999   | 4 |
| C9orf82  | 9_26297529_27664431    | 4 |
| ANO10    | 3_43189682_44887446    | 4 |
| NPC2     | 14_73538366_75214580   | 4 |
| RNF38    | 9_35523348_37085007    | 4 |

|           |                        |   |
|-----------|------------------------|---|
| TESK1     | 9_35523348_37085007    | 3 |
| GBE1      | 3_81432533_82394400    | 3 |
| DDO       | 6_109168061_112756362  | 3 |
| RPL15     | 3_23001825_24269384    | 3 |
| IPO4      | 14_23452745_23973123   | 3 |
| TINF2     | 14_23452745_23973123   | 3 |
| MAPKAP1   | 9_127035418_127435933  | 3 |
| NEK4      | 3_49220649_53001753    | 3 |
| RAD54L2   | 3_49220649_53001753    | 3 |
| CACNA2D2  | 3_49220649_53001753    | 3 |
| SERPINA6  | 14_91904853_94123764   | 3 |
| LARS2     | 3_44897145_49188640    | 3 |
| C14orf147 | 14_32812162_34288375   | 3 |
| AK1       | 9_129662767_130209348  | 3 |
| DLC1      | 8_12777448_13063924    | 3 |
| PTPRD     | 9_8270950_8423044      | 3 |
| KLHL9     | 9_20807835_21445813    | 3 |
| TRAF3     | 14_100344336_102698490 | 3 |
| KCNK10    | 14_87688655_87991468   | 3 |
| STRN3     | 14_30349237_31352314   | 3 |
| AZI2      | 3_27731255_28786332    | 3 |
| CASP8AP2  | 6_90135121_91423459    | 3 |
| CLASP2    | 3_30861158_34026328    | 3 |
| SAMD4A    | 14_53873515_54481493   | 3 |
| HIGD1A    | 3_42343012_43143225    | 3 |
| T         | 6_165958177_167074864  | 3 |
| VLDLR     | 9_2559655_2952417      | 3 |
| SOBP      | 6_107556334_108718558  | 3 |
| CX3CR1    | 3_39227673_39883848    | 3 |
| YLPM1     | 14_73538366_75214580   | 3 |
| FBXW2     | 9_122162008_124248881  | 3 |
| TCF7L2    | 10_114129886_115474189 | 3 |
| NEDD8     | 14_23452745_23973123   | 3 |
| ENG       | 9_128580791_129662766  | 3 |
| MMP14     | 14_22048600_22665560   | 3 |
| RAGE      | 14_100344336_102698490 | 3 |
| WBP11     | 12_14813007_14834182   | 3 |
| C14orf169 | 14_72413330_73197695   | 3 |
| RNASET2   | 6_167187909_167746804  | 3 |
| SLC17A5   | 6_74286513_74830132    | 3 |
| SPTLC1    | 9_93727422_94324032    | 3 |
| KATNA1    | 6_149315857_149992906  | 3 |
| ANKRD6    | 6_90135121_91423459    | 3 |
| CIZ1      | 9_129662767_130209348  | 3 |
| KLF9      | 9_71621900_72807090    | 3 |
| RABGGTA   | 14_23452745_23973123   | 3 |
| TRAF3IP2  | 6_109168061_112756362  | 3 |

|           |                        |   |
|-----------|------------------------|---|
| EDEM1     | 3_4640228_5379903      | 3 |
| GABRR2    | 6_89266711_90133403    | 3 |
| EIF5      | 14_102698491_103162541 | 3 |
| MGAT2     | 14_48594272_49275522   | 3 |
| SEMA3F    | 3_49220649_53001753    | 3 |
| RARB      | 3_25209537_27205590    | 3 |
| CEBPE     | 14_22048600_22665560   | 3 |
| BCKDHB    | 6_79436179_81341225    | 3 |
| TTLL3     | 3_9737595_11040806     | 3 |
| ITPR1     | 3_4168500_4640227      | 3 |
| CCBL1     | 9_130329421_131084190  | 3 |
| MAPK1IP1L | 14_54579863_55048577   | 3 |
| COX7A2    | 6_74875451_77396866    | 3 |
| SEC61B    | 9_100899897_101056711  | 3 |
| C14orf2   | 14_103218092_103635871 | 3 |
| GPR27     | 3_71768772_72259304    | 3 |
| GCH1      | 14_53873515_54481493   | 3 |
| LRRC19    | 9_26297529_27664431    | 3 |
| MKRN2     | 3_12450088_12836607    | 3 |
| ARF4      | 3_57368682_57884297    | 3 |
| SEL1L     | 14_79355997_81577951   | 3 |
| UBA7      | 3_49220649_53001753    | 3 |
| RRAGA     | 9_18979696_19197364    | 3 |
| DCP1A     | 3_53179885_54098050    | 3 |
| ENPP1     | 6_131763569_132304683  | 3 |
| SCN10A    | 3_38618283_39223855    | 3 |
| ACVR2B    | 3_37967544_38537395    | 3 |
| EAPP      | 14_32812162_34288375   | 3 |
| NUP210    | 3_12915346_14322584    | 3 |
| EIF2S1    | 14_66874128_66925079   | 3 |
| MARK3     | 14_102698491_103162541 | 3 |
| ALAD      | 9_115037070_115782034  | 3 |
| LG MN     | 14_91904853_94123764   | 3 |
| CMTM6     | 3_30861158_34026328    | 3 |
| NFIL3     | 9_92877674_93702294    | 3 |
| GALT      | 9_34490610_35516604    | 3 |
| EIF2B2    | 14_73538366_75214580   | 3 |
| BCLAF1    | 6_136317780_136692186  | 3 |
| ABCD4     | 14_73538366_75214580   | 3 |
| PPM1A     | 14_59453438_60386016   | 2 |
| APTX      | 9_32960518_32973441    | 2 |
| PSMB7     | 9_125960101_126223887  | 2 |
| CLDND1    | 3_99713960_100428760   | 2 |
| PLAGL1    | 6_144123302_144707049  | 2 |
| SMAP1     | 6_70796754_71812194    | 2 |
| USP20     | 9_131111946_132261748  | 2 |
| ALDH1B1   | 9_37085008_38426991    | 2 |

|          |                        |   |
|----------|------------------------|---|
| ABLIM1   | 10_115676858_116409310 | 2 |
| PPP3CB   | 10_73715923_76042042   | 2 |
| L2HGDH   | 14_49764449_50156136   | 2 |
| OR7E156P | 13_62118887_64093410   | 2 |
| RPL35    | 9_126285350_126728434  | 2 |
| CTGF     | 6_132307358_132574240  | 2 |
| RUFY2    | 10_69739239_69867524   | 2 |
| TATDN2   | 3_9737595_11040806     | 2 |
| DNAJA1   | 9_32973442_33041684    | 2 |
| PIGO     | 9_34490610_35516604    | 2 |
| PCMT1    | 6_150013780_151967069  | 2 |
| NGDN     | 14_22668792_23199978   | 2 |
| LCN2     | 9_129662767_130209348  | 2 |
| QRICH1   | 3_44897145_49188640    | 2 |
| LSM3     | 3_12915346_14322584    | 2 |
| IQSEC1   | 3_12903762_12915345    | 2 |
| TNFAIP3  | 6_137641607_138836435  | 2 |
| CCDC28A  | 6_138842339_139665700  | 2 |
| GPHN     | 14_65941325_66596885   | 2 |
| CHD8     | 14_19722395_21117922   | 2 |
| LMCD1    | 3_8440869_9285534      | 2 |
| EZR      | 6_158518568_159302317  | 2 |
| HNRNPC   | 14_19722395_21117922   | 2 |
| TMEM38B  | 9_106593345_107511705  | 2 |
| MTO1     | 6_73918251_74266789    | 2 |
| PPP2R5C  | 14_100344336_102698490 | 2 |
| FPGS     | 9_128580791_129662766  | 2 |
| SLC31A2  | 9_114950812_115037069  | 2 |
| SESN1    | 6_109168061_112756362  | 2 |
| PTGES    | 9_131111946_132261748  | 2 |
| PNRC1    | 6_89266711_90133403    | 2 |
| MOAP1    | 14_91904853_94123764   | 2 |
| C14orf79 | 14_103638225_104746745 | 2 |
| PRRX2    | 9_131111946_132261748  | 2 |
| RPP14    | 3_58186123_58682005    | 2 |
| RPS6     | 9_19280143_19432557    | 2 |
| USP19    | 3_44897145_49188640    | 2 |
| CHL1     | 3_135814_442156        | 2 |
| SH3GLB2  | 9_130329421_131084190  | 2 |
| GMFB     | 14_53873515_54481493   | 2 |
| TWF2     | 3_49220649_53001753    | 2 |
| ARIH2    | 3_44897145_49188640    | 2 |
| CHMP5    | 9_33069023_34267052    | 2 |
| CALM1    | 14_88531099_90228621   | 2 |
| PRSS3    | 9_33069023_34267052    | 2 |
| FHIT     | 3_59641041_60037675    | 2 |
| VPS13A   | 9_78471939_79873671    | 2 |

|          |                       |   |
|----------|-----------------------|---|
| SVEP1    | 9_112150601_112599891 | 2 |
| MAX      | 14_64373004_64780332  | 2 |
| SYNE1    | 6_152461219_152577227 | 2 |
| GTF2H5   | 6_158508690_158518567 | 2 |
| DDX21    | 10_70380444_70445086  | 2 |
| ZFAND5   | 9_74011070_74616808   | 2 |
| BRPF1    | 3_9737595_11040806    | 2 |
| MLH3     | 14_73538366_75214580  | 2 |
| SLC22A14 | 3_37967544_38537395   | 2 |

**Table S4. Genes determined to be gained and overexpressed in the Broad Data**

| Gene     | Segment               | Expression fold change |
|----------|-----------------------|------------------------|
| NDUFA4L2 | 12_54366879_56129280  | 508                    |
| NPTX2    | 7_95384689_101758635  | 158                    |
| PTHLH    | 12_27564085_28066083  | 109                    |
| ENO2     | 12_6492372_7963274    | 86                     |
| BHLHE41  | 12_25546789_26743410  | 56                     |
| TFPI2    | 7_90533015_95384688   | 51                     |
| TRIB3    | 20_95685_374348       | 49                     |
| FABP6    | 5_156425016_160082950 | 39                     |
| FCGR1A   | 1_147927564_148246033 | 38                     |
| ASPM     | 1_195278200_196088493 | 34                     |
| LOX      | 5_120119005_121527211 | 32                     |
| EZH2     | 7_147293493_150133540 | 26                     |
| DTL      | 1_206487211_210712847 | 26                     |
| TGFBI    | 5_135197452_136459021 | 26                     |
| LPCAT1   | 5_905566_3218157      | 25                     |
| FCGR3A   | 1_159733666_160217074 | 22                     |
| VWF      | 12_5010295_6215340    | 20                     |
| STC2     | 5_172499304_172909855 | 20                     |
| VCAN     | 5_82026732_88090518   | 19                     |
| CENPF    | 1_210712848_213286053 | 19                     |
| CTSS     | 1_148246034_150281108 | 18                     |
| HAPLN1   | 5_82026732_88090518   | 18                     |
| COL1A2   | 7_90533015_95384688   | 15                     |
| RGS1     | 1_188993047_191920911 | 14                     |
| SNAP25   | 20_9769007_11554624   | 14                     |
| CD48     | 1_158249099_159381938 | 14                     |
| PTTG1    | 5_156425016_160082950 | 13                     |
| CD1D     | 1_152014240_158192054 | 13                     |
| SLC1A3   | 5_36066216_37412706   | 12                     |
| SHMT2    | 12_54366879_56129280  | 12                     |
| CAV1     | 7_110986533_118055283 | 12                     |
| FCER1G   | 1_159381939_159733665 | 12                     |
| RFC2     | 7_71849412_75155153   | 12                     |
| CD36     | 7_79593811_83608283   | 12                     |
| PTPRC    | 1_196835288_197646230 | 11                     |
| RASSF2   | 20_1637621_5990626    | 11                     |
| LYZ      | 12_66962131_68063066  | 11                     |
| FYB      | 5_37412707_40950921   | 11                     |
| HAVCR1   | 5_155743628_156425015 | 11                     |
| LCP2     | 5_169158099_169962810 | 11                     |
| C1R      | 12_6492372_7963274    | 10                     |
| MNDA     | 1_152014240_158192054 | 10                     |
| FCGR2B   | 1_159733666_160217074 | 10                     |
| FCGR2C   | 1_159733666_160217074 | 10                     |

|            |                       |    |
|------------|-----------------------|----|
| ERAP2      | 5_96114802_96389162   | 10 |
| LHFPL2     | 5_74706210_80261858   | 10 |
| SLAMF8     | 1_152014240_158192054 | 10 |
| CDH6       | 5_30143053_32648673   | 10 |
| SSPN       | 12_25546789_26743410  | 10 |
| OLFML2B    | 1_160217075_160683730 | 10 |
| HSPA6      | 1_159733666_160217074 | 9  |
| SERPINE1   | 7_95384689_101758635  | 9  |
| NCKAP1L    | 12_50573516_53246203  | 9  |
| HIST2H2AA3 | 1_147927564_148246033 | 9  |
| OSMR       | 5_37412707_40950921   | 9  |
| CST7       | 20_24871818_24962205  | 9  |
| CCNB1      | 5_67389079_70785500   | 9  |
| C1S        | 12_6492372_7963274    | 9  |
| ITGA5      | 12_50573516_53246203  | 9  |
| NCF2       | 1_181374069_183181570 | 9  |
| CD163      | 12_6492372_7963274    | 8  |
| MET        | 7_110986533_118055283 | 8  |
| ARPC1B     | 7_95384689_101758635  | 8  |
| CALU       | 7_127693143_132921573 | 8  |
| ADCY2      | 5_7849625_8221731     | 8  |
| CD84       | 1_158249099_159381938 | 8  |
| AIM2       | 1_152014240_158192054 | 8  |
| FAM129A    | 1_183181571_183336183 | 7  |
| SLC2A3     | 12_7963275_8022224    | 7  |
| CEP170     | 1_238406736_243105440 | 7  |
| C3AR1      | 12_8022225_10806863   | 7  |
| PPFIA4     | 1_200616803_206367841 | 7  |
| PVRIG      | 7_95384689_101758635  | 7  |
| SLC2A14    | 12_6492372_7963274    | 7  |
| GLIPR1     | 12_73266078_74267531  | 7  |
| BICD1      | 12_32036267_33203463  | 7  |
| NCAPG2     | 7_154577582_158821424 | 7  |
| PRIM1      | 12_54366879_56129280  | 7  |
| CAV2       | 7_110986533_118055283 | 7  |
| FKBP11     | 12_47320593_50488290  | 7  |
| TEAD4      | 12_485647_3235060     | 6  |
| CLEC2B     | 12_8022225_10806863   | 6  |
| DOCK2      | 5_169158099_169962810 | 6  |
| ANP32E     | 1_148246034_150281108 | 6  |
| RBCK1      | 20_95685_374348       | 6  |
| IL7R       | 5_35455710_35977130   | 6  |
| SIRPA      | 20_1637621_5990626    | 6  |
| MCM7       | 7_95384689_101758635  | 6  |
| CD4        | 12_6492372_7963274    | 6  |
| FCGR2A     | 1_159733666_160217074 | 6  |
| TPK1       | 7_143909631_144337225 | 6  |

|          |                       |   |
|----------|-----------------------|---|
| TNFAIP8  | 5_118686630_120119004 | 6 |
| SLC38A1  | 12_44639392_45622399  | 5 |
| EPRS     | 1_217655426_218949448 | 5 |
| GM2A     | 5_147855254_151056987 | 5 |
| SMYD2    | 1_210712848_213286053 | 5 |
| C1RL     | 12_6492372_7963274    | 5 |
| C1orf107 | 1_206487211_210712847 | 5 |
| GZMA     | 5_54069039_55910565   | 5 |
| ESM1     | 5_54069039_55910565   | 5 |
| CLEC2D   | 12_8022225_10806863   | 5 |
| RIT1     | 1_152014240_158192054 | 5 |
| IFI16    | 1_152014240_158192054 | 5 |
| CD14     | 5_139598347_142105360 | 5 |
| TMEM140  | 7_132921574_134520986 | 5 |
| CLEC7A   | 12_8022225_10806863   | 5 |
| ERAP1    | 5_96114802_96389162   | 5 |
| NEK2     | 1_206487211_210712847 | 5 |
| PLCB4    | 20_8767112_9769006    | 5 |
| KIF14    | 1_197951166_200616802 | 5 |
| TRAF5    | 1_206487211_210712847 | 5 |
| KIF20A   | 5_136459022_137835859 | 5 |
| NAP1L1   | 12_74577823_75780811  | 5 |
| KIF2A    | 5_57110733_63247729   | 5 |
| DBF4     | 7_86654922_87551514   | 5 |
| IRF1     | 5_130328493_133004280 | 5 |
| TRIO     | 5_11007878_14650298   | 5 |
| LMNB1    | 5_125765866_128520881 | 5 |
| S100A1   | 1_150450773_152014239 | 5 |
| BIN2     | 12_47320593_50488290  | 5 |
| FCGR3B   | 1_159733666_160217074 | 4 |
| LAT2     | 7_71849412_75155153   | 4 |
| SEMA6A   | 5_115816552_116174663 | 4 |
| IRAK4    | 12_41934614_42889176  | 4 |
| MAP1B    | 5_70785501_72120842   | 4 |
| CDCA3    | 12_6492372_7963274    | 4 |
| TBXAS1   | 7_136664006_140663828 | 4 |
| RAD51AP1 | 12_4281818_5010294    | 4 |
| DEGS1    | 1_221533939_222651345 | 4 |
| DNAJC22  | 12_47320593_50488290  | 4 |
| CSDA     | 12_8022225_10806863   | 4 |
| ZNF107   | 7_63299591_64881030   | 4 |
| PDIA4    | 7_147293493_150133540 | 4 |
| CSF1R    | 5_147855254_151056987 | 4 |
| CD247    | 1_165098496_166859489 | 4 |
| BMP2     | 20_5990627_8767111    | 4 |
| MGAT1    | 5_179141665_180857866 | 4 |
| KRT18    | 12_50573516_53246203  | 4 |



|          |                       |   |
|----------|-----------------------|---|
| FAM134B  | 5_15788014_17743185   | 4 |
| PARP12   | 7_136664006_140663828 | 4 |
| ARHGAP26 | 5_142534355_142738586 | 4 |
| FEM1C    | 5_113972867_115816551 | 4 |
| ASNS     | 7_95384689_101758635  | 4 |
| PLOD3    | 7_95384689_101758635  | 4 |
| MCTP1    | 5_94117227_94635667   | 4 |
| AKR1B1   | 7_132921574_134520986 | 4 |
| PARP8    | 5_49993978_51860389   | 4 |
| SLC39A1  | 1_152014240_158192054 | 4 |
| EGLN1    | 1_226946738_229894663 | 4 |
| PUS7     | 7_101758636_105169963 | 4 |
| FAR2     | 12_28066084_30126687  | 4 |
| KCTD3    | 1_213336033_214226557 | 4 |
| TTC13    | 1_226946738_229894663 | 4 |
| SOAT1    | 1_176935735_177814889 | 4 |
| GIN51    | 20_25150508_25437691  | 4 |
| CLEC4A   | 12_8022225_10806863   | 4 |
| KCNK1    | 1_230531128_232234479 | 4 |
| SFT2D2   | 1_165098496_166859489 | 4 |
| ARNT     | 1_148246034_150281108 | 4 |
| ADCK2    | 7_136664006_140663828 | 4 |
| QSOX1    | 1_177814890_180091632 | 4 |
| ITK      | 5_156425016_160082950 | 4 |
| LPGAT1   | 1_206487211_210712847 | 4 |
| PDCD6    | 5_165712_905565       | 4 |
| BLZF1    | 1_167436564_167994760 | 4 |
| ANGEL2   | 1_210712848_213286053 | 4 |
| LGALS8   | 1_233142787_236795120 | 4 |
| ENAH     | 1_223758043_224902699 | 4 |
| NRCAM    | 7_107526721_109640518 | 4 |
| RECQL    | 12_19727893_21595820  | 4 |
| NAIP     | 5_67389079_70785500   | 4 |
| GBA      | 1_152014240_158192054 | 4 |
| RACGAP1  | 12_47320593_50488290  | 4 |
| SCNM1    | 1_148246034_150281108 | 3 |
| NVL      | 1_221533939_222651345 | 3 |
| RNF24    | 20_1637621_5990626    | 3 |
| TES      | 7_110986533_118055283 | 3 |
| HEXB     | 5_73803692_74706209   | 3 |
| PRRC1    | 5_125765866_128520881 | 3 |
| TAGLN2   | 1_152014240_158192054 | 3 |
| H2AFY    | 5_134027026_135197451 | 3 |
| HLX      | 1_218949449_219671602 | 3 |
| CDS2     | 20_1637621_5990626    | 3 |
| THG1L    | 5_156425016_160082950 | 3 |
| TNIP1    | 5_147855254_151056987 | 3 |

|           |                       |   |
|-----------|-----------------------|---|
| TMED9     | 5_174721574_177333987 | 3 |
| PIK3C2B   | 1_200616803_206367841 | 3 |
| NR3C1     | 5_142738587_144585937 | 3 |
| ELL2      | 5_95280258_96114801   | 3 |
| RAB4A     | 1_226946738_229894663 | 3 |
| PDZD2     | 5_30143053_32648673   | 3 |
| NENF      | 1_206487211_210712847 | 3 |
| DHX9      | 1_180217414_181374068 | 3 |
| ZNF124    | 1_245275157_247249719 | 3 |
| SMYD3     | 1_244062159_244758631 | 3 |
| NUCKS1    | 1_200616803_206367841 | 3 |
| ACBD3     | 1_223758043_224902699 | 3 |
| OAZ3      | 1_148246034_150281108 | 3 |
| PLEKHO1   | 1_148246034_150281108 | 3 |
| TTC26     | 7_136664006_140663828 | 3 |
| S100A13   | 1_150450773_152014239 | 3 |
| RRBP1     | 20_17346979_21123549  | 3 |
| DYRK2     | 12_66120331_66820606  | 3 |
| LTBR      | 12_6215341_6489131    | 3 |
| NAMPT     | 7_105380819_106046264 | 3 |
| GUK1      | 1_225676514_226946737 | 3 |
| TAPBPL    | 12_6215341_6489131    | 3 |
| POLR3C    | 1_143840501_144941842 | 3 |
| TUBA1B    | 12_47320593_50488290  | 3 |
| RPS6KC1   | 1_210712848_213286053 | 3 |
| ZNF692    | 1_245275157_247249719 | 3 |
| TBCE      | 1_233142787_236795120 | 3 |
| LAMC1     | 1_181374069_183181570 | 3 |
| INTS7     | 1_206487211_210712847 | 3 |
| GLUL      | 1_180217414_181374068 | 3 |
| CEP350    | 1_177814890_180091632 | 3 |
| C12orf4   | 12_4281818_5010294    | 3 |
| SEC24A    | 5_134027026_135197451 | 3 |
| PCTK3     | 1_200616803_206367841 | 3 |
| KCNMB1    | 5_169158099_169962810 | 3 |
| ABLIM3    | 5_147855254_151056987 | 3 |
| SSR2      | 1_152014240_158192054 | 3 |
| ZYX       | 7_140663829_143370471 | 3 |
| DPY19L2P2 | 7_101758636_105169963 | 3 |
| MARCH3    | 5_125765866_128520881 | 3 |
| KLRB1     | 12_8022225_10806863   | 3 |
| SLC26A2   | 5_147855254_151056987 | 3 |
| PION      | 7_75198775_77568076   | 3 |
| FAF2      | 5_174721574_177333987 | 3 |
| LAMB3     | 1_206487211_210712847 | 3 |
| POT1      | 7_123792669_124921056 | 3 |
| CNIH4     | 1_221533939_222651345 | 3 |

|          |                       |   |
|----------|-----------------------|---|
| ARHGDIB  | 12_13809358_15172181  | 3 |
| PLCB1    | 20_8767112_9769006    | 3 |
| GNG11    | 7_90533015_95384688   | 3 |
| STX6     | 1_177814890_180091632 | 3 |
| UBE2D2   | 5_138191558_139598346 | 3 |
| MSTO1    | 1_152014240_158192054 | 3 |
| DDX41    | 5_174721574_177333987 | 3 |
| TNFRSF1A | 12_6215341_6489131    | 3 |
| POLR3G   | 5_88925711_90096537   | 3 |
| EDEM3    | 1_181374069_183181570 | 3 |
| CD74     | 5_147855254_151056987 | 3 |
| SAMD9    | 7_90533015_95384688   | 3 |
| PON2     | 7_90533015_95384688   | 3 |
| CKS1B    | 1_152014240_158192054 | 3 |
| ERO1LB   | 1_233142787_236795120 | 3 |
| C7orf23  | 7_86654922_87551514   | 3 |
| CLSTN3   | 12_6492372_7963274    | 3 |
| TAF1A    | 1_220400296_221533938 | 3 |
| CCDC99   | 5_168833277_169158098 | 3 |
| S100A11  | 1_148246034_150281108 | 3 |
| HEATR1   | 1_233142787_236795120 | 3 |
| EXOC3    | 5_165712_905565       | 3 |
| ATG12    | 5_113972867_115816551 | 3 |
| LMAN2    | 5_174721574_177333987 | 3 |
| NUP107   | 12_66962131_68063066  | 3 |
| ARPC5    | 1_181374069_183181570 | 3 |
| DDX11    | 12_31086539_31268399  | 3 |
| MPZL1    | 1_165098496_166859489 | 3 |
| C12orf10 | 12_50573516_53246203  | 3 |
| PA2G4    | 12_54366879_56129280  | 3 |
| ATF6     | 1_159733666_160217074 | 3 |
| EFNA3    | 1_152014240_158192054 | 3 |
| NCAPD2   | 12_6492372_7963274    | 3 |
| DNAJB6   | 7_154577582_158821424 | 3 |
| TUBA1C   | 12_47320593_50488290  | 3 |
| CD27     | 12_6215341_6489131    | 3 |
| MAPKAPK2 | 1_200616803_206367841 | 3 |
| CDC73    | 1_188993047_191920911 | 3 |
| MDFIC    | 7_110986533_118055283 | 3 |
| TBL2     | 7_71849412_75155153   | 3 |
| TOMM20   | 1_233142787_236795120 | 3 |
| EFNA1    | 1_152014240_158192054 | 3 |
| PHTF2    | 7_75198775_77568076   | 3 |
| CASP2    | 7_140663829_143370471 | 3 |
| CNOT2    | 12_68063067_71500022  | 3 |
| GON4L    | 1_152014240_158192054 | 3 |
| NPM1     | 5_169962811_171053813 | 3 |

|                 |                       |   |
|-----------------|-----------------------|---|
| GIMAP5          | 7_147293493_150133540 | 3 |
| STAT2           | 12_54366879_56129280  | 3 |
| ETV6            | 12_10806864_12175856  | 3 |
| CDC25B          | 20_1637621_5990626    | 3 |
| RHEB            | 7_150133541_151849176 | 3 |
| FAM115A         | 7_140663829_143370471 | 3 |
| RINT1           | 7_101758636_105169963 | 3 |
| CAMSAP1L1       | 1_197951166_200616802 | 3 |
| C1orf156        | 1_167994761_170094692 | 3 |
| GIMAP4          | 7_147293493_150133540 | 3 |
| SPATS2          | 12_47320593_50488290  | 3 |
| CSNK1A1         | 5_147855254_151056987 | 3 |
| SEPT8           | 5_130328493_133004280 | 3 |
| ANKHD1-EIF4EBP3 | 5_139598347_142105360 | 3 |
| POP7            | 7_95384689_101758635  | 3 |
| KRT8            | 12_50573516_53246203  | 3 |
| LYST            | 1_233142787_236795120 | 3 |
| RRP15           | 1_215502259_217655425 | 3 |
| DOCK4           | 7_110986533_118055283 | 3 |
| NOP2            | 12_6492372_7963274    | 3 |
| SHFM1           | 7_95384689_101758635  | 3 |
| IFFO1           | 12_6492372_7963274    | 2 |
| PTPN12          | 7_75198775_77568076   | 2 |
| GOLPH3L         | 1_148246034_150281108 | 2 |
| MR1             | 1_177814890_180091632 | 2 |
| PTPN6           | 12_6492372_7963274    | 2 |
| SYT11           | 1_152014240_158192054 | 2 |
| PCNXL2          | 1_230531128_232234479 | 2 |
| TPR             | 1_183961436_184732518 | 2 |
| RBM34           | 1_233142787_236795120 | 2 |
| S100A10         | 1_148246034_150281108 | 2 |
| MAGOHB          | 12_8022225_10806863   | 2 |
| HAX1            | 1_152014240_158192054 | 2 |
| BGLAP           | 1_152014240_158192054 | 2 |
| CAMLG           | 5_134027026_135197451 | 2 |
| BAT2D1          | 1_167994761_170094692 | 2 |
| C1orf25         | 1_183336184_183726313 | 2 |
| TIPRL           | 1_165098496_166859489 | 2 |
| BUD31           | 7_95384689_101758635  | 2 |
| SHC1            | 1_152014240_158192054 | 2 |
| DISC1           | 1_229894664_230213873 | 2 |
| C1orf27         | 1_183961436_184732518 | 2 |
| BET1            | 7_90533015_95384688   | 2 |
| TXNDC15         | 5_134027026_135197451 | 2 |
| PSMD4           | 1_148246034_150281108 | 2 |
| ISG20L2         | 1_152014240_158192054 | 2 |
| NSL1            | 1_210712848_213286053 | 2 |

|           |                       |   |
|-----------|-----------------------|---|
| FKBP1A    | 20_951002_1637620     | 2 |
| CAST      | 5_96114802_96389162   | 2 |
| FZD1      | 7_90533015_95384688   | 2 |
| ARF5      | 7_125216228_127693142 | 2 |
| MRPL24    | 1_152014240_158192054 | 2 |
| HIST2H2BE | 1_147927564_148246033 | 2 |
| SLC12A7   | 5_905566_3218157      | 2 |
| ARNTL2    | 12_26917454_27548427  | 2 |
| CHD1L     | 1_145227668_145279760 | 2 |
| TCERG1    | 5_145444661_145900362 | 2 |
| C7orf42   | 7_64881031_68370452   | 2 |
| UCHL5     | 1_188993047_191920911 | 2 |
| GNPAT     | 1_226946738_229894663 | 2 |
| SNRPB     | 20_1637621_5990626    | 2 |
| TULP3     | 12_485647_3235060     | 2 |
| SND1      | 7_125216228_127693142 | 2 |
| PHLDA1    | 12_74577823_75780811  | 2 |
| NOTCH2NL  | 1_143840501_144941842 | 2 |
| TP53TG1   | 7_86654922_87551514   | 2 |
| ATF7IP    | 12_13809358_15172181  | 2 |
| AP3S1     | 5_113972867_115816551 | 2 |
| LBR       | 1_222651346_223758042 | 2 |
| TLR5      | 1_220400296_221533938 | 2 |
| KIF3A     | 5_130328493_133004280 | 2 |
| SPARC     | 5_147855254_151056987 | 2 |
| C1orf112  | 1_167994761_170094692 | 2 |
| RBBP5     | 1_200616803_206367841 | 2 |
| TMEM194A  | 12_54366879_56129280  | 2 |
| SMG7      | 1_181374069_183181570 | 2 |
| SIRPB1    | 20_951002_1637620     | 2 |
| PILRA     | 7_95384689_101758635  | 2 |
| XPOT      | 12_61992189_63321111  | 2 |
| RGS14     | 5_174721574_177333987 | 2 |
| BOLA1     | 1_147927564_148246033 | 2 |
| BCAT1     | 12_24710244_25013763  | 2 |
| C7orf54   | 7_125216228_127693142 | 2 |
| DENND1B   | 1_195278200_196088493 | 2 |
| C7orf64   | 7_90533015_95384688   | 2 |
| CD93      | 20_21123550_23209338  | 2 |
| HISPPD1   | 5_102115171_104398468 | 2 |
| SNRPE     | 1_200616803_206367841 | 2 |
| C20orf12  | 20_17346979_21123549  | 2 |
| LSM8      | 7_110986533_118055283 | 2 |
| DGKA      | 12_54366879_56129280  | 2 |
| CDK7      | 5_67389079_70785500   | 2 |
| SLC36A1   | 5_147855254_151056987 | 2 |
| GAPDH     | 12_6492372_7963274    | 2 |

|          |                       |   |
|----------|-----------------------|---|
| C7orf49  | 7_132921574_134520986 | 2 |
| KLHDC10  | 7_127693143_132921573 | 2 |
| MIA3     | 1_220400296_221533938 | 2 |
| LGTN     | 1_200616803_206367841 | 2 |
| TPI1     | 12_6492372_7963274    | 2 |
| DNAJC2   | 7_101758636_105169963 | 2 |
| OBFC2B   | 12_54366879_56129280  | 2 |
| ADAM22   | 7_87551515_87753161   | 2 |
| NUP205   | 7_134573946_135182063 | 2 |
| TOR3A    | 1_176935735_177814889 | 2 |
| NME7     | 1_167436564_167994760 | 2 |
| POLS     | 5_6732716_7849624     | 2 |
| ABCB4    | 7_86654922_87551514   | 2 |
| MTRR     | 5_7849625_8221731     | 2 |
| RAPGEF6  | 5_130328493_133004280 | 2 |
| BAZ1B    | 7_71849412_75155153   | 2 |
| PRKAA1   | 5_37412707_40950921   | 2 |
| ELK4     | 1_200616803_206367841 | 2 |
| NOP16    | 5_174721574_177333987 | 2 |
| CDK5     | 7_150133541_151849176 | 2 |
| VPS16    | 20_1637621_5990626    | 2 |
| NOP56    | 20_1637621_5990626    | 2 |
| YIPF5    | 5_142738587_144585937 | 2 |
| RIOK2    | 5_96389163_96560374   | 2 |
| PCYOX1L  | 5_147855254_151056987 | 2 |
| CLIP2    | 7_71849412_75155153   | 2 |
| LRRC23   | 12_6492372_7963274    | 2 |
| MFAP3    | 5_151855184_153692315 | 2 |
| TARS2    | 1_148246034_150281108 | 2 |
| DAP3     | 1_152014240_158192054 | 2 |
| STK10    | 5_171053814_172499303 | 2 |
| GTF2H2B  | 5_67389079_70785500   | 2 |
| CSNK1G3  | 5_122508801_123538097 | 2 |
| DIMT1L   | 5_57110733_63247729   | 2 |
| GPATCH2  | 1_215502259_217655425 | 2 |
| MDM4     | 1_200616803_206367841 | 2 |
| LNPEP    | 5_96389163_96560374   | 2 |
| EFCAB2   | 1_243105441_243889521 | 2 |
| ORC5L    | 7_101758636_105169963 | 2 |
| PCNA     | 20_1637621_5990626    | 2 |
| HMGXB3   | 5_147855254_151056987 | 2 |
| RABGAP1L | 1_170094693_174668878 | 2 |
| HMMR     | 5_160090803_163151586 | 2 |
| ORAI2    | 7_101758636_105169963 | 2 |
| RAD50    | 5_130328493_133004280 | 2 |
| COPA     | 1_158249099_159381938 | 2 |
| PDLIM4   | 5_130328493_133004280 | 2 |

|          |                       |   |
|----------|-----------------------|---|
| PRR16    | 5_118686630_120119004 | 2 |
| ABCF2    | 7_150133541_151849176 | 2 |
| TRIP13   | 5_905566_3218157      | 2 |
| ATP2B4   | 1_200616803_206367841 | 2 |
| CDKL3    | 5_133004281_134027025 | 2 |
| LPCAT3   | 12_6492372_7963274    | 2 |
| GLRX2    | 1_188993047_191920911 | 2 |
| HSPB1    | 7_75198775_77568076   | 2 |
| SKP2     | 5_36066216_37412706   | 2 |
| HSD17B7  | 1_160683731_162621656 | 2 |
| DYRK4    | 12_4281818_5010294    | 2 |
| HNRNPA1  | 12_50573516_53246203  | 2 |
| CENPB    | 20_1637621_5990626    | 2 |
| KLRK1    | 12_8022225_10806863   | 2 |
| PIGC     | 1_170094693_174668878 | 2 |
| SSBP1    | 7_140663829_143370471 | 2 |
| F12      | 5_174721574_177333987 | 2 |
| RABIF    | 1_200616803_206367841 | 2 |
| DPYSL3   | 5_146746956_147021014 | 2 |
| CACYBP   | 1_170094693_174668878 | 2 |
| C12orf35 | 12_32036267_33203463  | 2 |
| HIP1     | 7_75198775_77568076   | 2 |
| FLAD1    | 1_152014240_158192054 | 2 |
| CCND2    | 12_4281818_5010294    | 2 |
| FBXO28   | 1_221533939_222651345 | 2 |
| INTS3    | 1_150450773_152014239 | 2 |
| PAXIP1   | 7_151892825_154577581 | 2 |
| SETDB1   | 1_148246034_150281108 | 2 |
| NXT1     | 20_23209339_24210649  | 2 |
| C1orf77  | 1_150450773_152014239 | 2 |
| PYGB     | 20_25150508_25437691  | 2 |
| DUSP10   | 1_219895299_220400295 | 2 |
| ZNF277   | 7_110986533_118055283 | 2 |

**Table S5. Genes determined to be lost and underexpressed in the Broad Data**

| <b>Gene</b> | <b>Segment</b>        | <b>Expression<br/>fold change</b> |
|-------------|-----------------------|-----------------------------------|
| ALDOB       | 9_102663484_103429072 | 3302                              |
| SFRP1       | 8_41063273_41698554   | 500                               |
| ALB         | 4_73663471_76224711   | 401                               |
| CYP4A11     | 1_46674133_48629899   | 366                               |
| LPA         | 6_158136847_161856223 | 258                               |
| PLG         | 6_158136847_161856223 | 248                               |
| CYP4A22     | 1_46674133_48629899   | 144                               |
| SERPINA5    | 14_93396982_95686082  | 140                               |
| CLCNKA      | 1_15686773_22424511   | 134                               |
| C4orf31     | 4_120452569_122282234 | 107                               |
| TACSTD2     | 1_57875598_59121115   | 88                                |
| PTH1R       | 3_46444018_47260430   | 87                                |
| DIO1        | 1_50946918_56866612   | 82                                |
| SLC7A8      | 14_22352539_23671157  | 79                                |
| MSTP9       | 1_15686773_22424511   | 79                                |
| AFM         | 4_73663471_76224711   | 74                                |
| DSP         | 6_6983787_7639261     | 71                                |
| FBP1        | 9_93245196_98133539   | 60                                |
| CLCNKB      | 1_15686773_22424511   | 59                                |
| HPGD        | 4_172505733_177565763 | 57                                |
| PTGER3      | 1_71016067_71827276   | 48                                |
| SLC17A3     | 6_25679405_26855016   | 47                                |
| DEFB1       | 8_5758247_6777063     | 46                                |
| SLC17A1     | 6_25679405_26855016   | 46                                |
| ANGPTL3     | 1_61398707_63150680   | 40                                |
| TRPM3       | 9_71640847_73014928   | 38                                |
| LRRC19      | 9_24933020_27532408   | 36                                |
| EGF         | 4_104359353_111388245 | 35                                |
| ALDH4A1     | 1_15686773_22424511   | 30                                |
| STAP1       | 4_66919436_73663470   | 30                                |
| TYRP1       | 9_12183278_12766839   | 29                                |
| NR3C2       | 4_148742883_150503367 | 29                                |
| ADH6        | 4_92137112_101656701  | 28                                |
| ZNF204      | 6_26855017_28440431   | 27                                |
| PTPRD       | 9_10496028_12183277   | 26                                |
| CHL1        | 3_260580_1343475      | 26                                |
| TCF21       | 6_132285229_134265256 | 25                                |
| FBLN5       | 14_87472574_91740937  | 25                                |
| ARG2        | 14_64339460_71326335  | 24                                |
| PDGFRA      | 4_53355418_56283605   | 24                                |
| ACOX2       | 3_58196862_58582663   | 23                                |
| TMEM30B     | 14_58884793_63484496  | 23                                |
| ANK2        | 4_111388246_115924197 | 20                                |
| ASS1        | 9_128950028_132878591 | 20                                |



|          |                       |    |
|----------|-----------------------|----|
| ACY1     | 3_51255115_53045501   | 20 |
| EPHX2    | 8_26497479_28338843   | 20 |
| SLC44A4  | 6_31650287_32453160   | 19 |
| TFAP2A   | 6_10359319_13178675   | 19 |
| SEMA3B   | 3_47260431_50416574   | 19 |
| ALDH6A1  | 14_73418572_74900873  | 19 |
| EPB41L4B | 9_110487487_114014428 | 19 |
| TPD52L1  | 6_125566417_129839944 | 19 |
| APOM     | 6_31650287_32453160   | 18 |
| ALDH8A1  | 6_134440866_139197369 | 18 |
| RASL11B  | 4_53355418_56283605   | 18 |
| PTGDS    | 9_135768997_140273252 | 18 |
| PCK2     | 14_22352539_23671157  | 17 |
| ADH1B    | 4_92137112_101656701  | 17 |
| PACRG    | 6_162832504_164136229 | 16 |
| EMCN     | 4_101656702_103403674 | 16 |
| GLDC     | 9_6132948_6660061     | 15 |
| MAN1C1   | 1_22424512_26139846   | 14 |
| SIM1     | 6_100648291_101160446 | 14 |
| PSAT1    | 9_78558807_80263106   | 14 |
| UGT2B28  | 4_66919436_73663470   | 14 |
| MSRA     | 8_9844234_10883890    | 13 |
| MOXD1    | 6_132285229_134265256 | 13 |
| IL17RB   | 3_53045502_54717947   | 13 |
| SLC16A10 | 6_110609524_111976782 | 13 |
| RALGPS1  | 9_128950028_132878591 | 12 |
| SH3GL2   | 9_17522840_18132659   | 12 |
| KIT      | 4_53355418_56283605   | 12 |
| VNN1     | 6_132285229_134265256 | 12 |
| FGFR3    | 4_1058778_2016544     | 12 |
| C4orf19  | 4_37238176_37280964   | 12 |
| TSPAN1   | 1_46407796_46674132   | 12 |
| TEK      | 9_24933020_27532408   | 12 |
| BPHL     | 6_2755768_5403145     | 12 |
| AK3L1    | 1_65302702_66916347   | 11 |
| NQO2     | 6_2755768_5403145     | 11 |
| AGXT2L1  | 4_104359353_111388245 | 11 |
| ANXA3    | 4_79729997_82431193   | 11 |
| ENTPD5   | 14_73418572_74900873  | 11 |
| PIP5K1B  | 9_70234710_70936991   | 10 |
| HSPA2    | 14_63484497_64339459  | 10 |
| TGFBR3   | 1_91392051_95193902   | 10 |
| F11      | 4_187441441_188051102 | 10 |
| MAPK10   | 4_86736078_88561173   | 10 |
| SEMA3G   | 3_51255115_53045501   | 10 |
| TRIM2    | 4_154123216_154946306 | 10 |
| FCN3     | 1_27048706_27721886   | 10 |

|          |                       |   |
|----------|-----------------------|---|
| CEL      | 9_134370616_135768996 | 9 |
| NROB2    | 1_27048706_27721886   | 9 |
| MST1     | 3_47260431_50416574   | 9 |
| ASPA     | 17_2508845_3495195    | 9 |
| PLAT     | 8_42154137_42971600   | 9 |
| SLC4A4   | 4_66919436_73663470   | 9 |
| KLKB1    | 4_186002571_187441440 | 9 |
| LAMA2    | 6_129839945_129879694 | 9 |
| GAS1     | 9_88530367_89149420   | 9 |
| NTRK2    | 9_83399968_87758063   | 9 |
| ADH1C    | 4_92137112_101656701  | 9 |
| MTTP     | 4_92137112_101656701  | 8 |
| ACAA1    | 3_36652490_39170967   | 8 |
| HADH     | 4_104359353_111388245 | 8 |
| DNASE1L3 | 3_57586277_58196861   | 8 |
| ZNF165   | 6_26855017_28440431   | 8 |
| TDGF1    | 3_46444018_47260430   | 8 |
| RAP1GAP  | 1_15686773_22424511   | 8 |
| PLXNB1   | 3_47260431_50416574   | 8 |
| CLMN     | 14_93396982_95686082  | 8 |
| ALAD     | 9_114263119_116127884 | 8 |
| TNNC1    | 3_51255115_53045501   | 8 |
| LTF      | 3_46444018_47260430   | 8 |
| SLC7A7   | 14_22352539_23671157  | 8 |
| FABP3    | 1_30514083_33994396   | 8 |
| PER1     | 17_6860981_8232348    | 8 |
| CDS1     | 4_84520712_86736077   | 7 |
| TCL6     | 14_93396982_95686082  | 7 |
| HDHD3    | 9_114263119_116127884 | 7 |
| BDH2     | 4_103864128_104359352 | 7 |
| CFI      | 4_104359353_111388245 | 7 |
| PAPPA    | 9_116141066_118287665 | 7 |
| GPD1L    | 3_30742814_34295257   | 7 |
| AMY1A    | 1_101337173_109048825 | 7 |
| TPMT     | 6_17637386_19325515   | 7 |
| GPHN     | 14_64339460_71326335  | 7 |
| TBC1D1   | 4_37643572_38708373   | 6 |
| AKR7A3   | 1_15686773_22424511   | 6 |
| KIF13B   | 8_28711850_29940701   | 6 |
| DHRS4    | 14_22352539_23671157  | 6 |
| FOS      | 14_73418572_74900873  | 6 |
| CTNNAL1  | 9_110487487_114014428 | 6 |
| F3       | 1_91392051_95193902   | 6 |
| ACOT1    | 14_73035327_73418571  | 6 |
| CTH      | 1_68238520_71016066   | 6 |
| OGG1     | 3_9530423_10218277    | 6 |
| PECI     | 6_2755768_5403145     | 6 |

|          |                        |   |
|----------|------------------------|---|
| KCNK10   | 14_87472574_91740937   | 6 |
| SLC22A13 | 3_36652490_39170967    | 6 |
| MFAP3L   | 4_169962502_172505732  | 6 |
| MYH10    | 17_8232349_10479170    | 6 |
| BCKDHB   | 6_81056932_85567673    | 6 |
| ALPL     | 1_15686773_22424511    | 6 |
| AQP3     | 9_33026981_37481279    | 6 |
| AK2      | 1_30514083_33994396    | 5 |
| CLDN7    | 17_6860981_8232348     | 5 |
| GCH1     | 14_54206517_56137447   | 5 |
| PTPN3    | 9_110487487_114014428  | 5 |
| ARHGAP24 | 4_86736078_88561173    | 5 |
| DIRAS3   | 1_68238520_71016066    | 5 |
| PEX7     | 6_134440866_139197369  | 5 |
| ETFDH    | 4_158210879_161774809  | 5 |
| BRP44L   | 6_165559698_167747797  | 5 |
| TBC1D13  | 9_128950028_132878591  | 5 |
| SLC26A6  | 3_47260431_50416574    | 5 |
| NBL1     | 1_15686773_22424511    | 5 |
| GRHPR    | 9_33026981_37481279    | 5 |
| CAMK2N1  | 1_15686773_22424511    | 5 |
| CXCL2    | 4_73663471_76224711    | 5 |
| SLC1A1   | 9_2386248_4838874      | 5 |
| NP       | 14_19487234_20715172   | 5 |
| CMAH     | 6_25076052_25679404    | 5 |
| FAM184A  | 6_119363250_119977194  | 5 |
| AMT      | 3_47260431_50416574    | 5 |
| SOBP     | 6_107742149_108278919  | 5 |
| NPY1R    | 4_164283640_164884832  | 5 |
| CTSL2    | 9_98590290_101187345   | 5 |
| CKB      | 14_101426228_106368585 | 5 |
| INADL    | 1_61398707_63150680    | 5 |
| RGS3     | 9_114263119_116127884  | 5 |
| ENPP1    | 6_132160377_132285228  | 5 |
| HYAL1    | 3_47260431_50416574    | 5 |
| LRRC16A  | 6_25679405_26855016    | 5 |
| DLGAP2   | 8_1171057_1736816      | 5 |
| PTCH1    | 9_93245196_98133539    | 5 |
| C17orf91 | 17_614127_2216518      | 5 |
| PTPN13   | 4_86736078_88561173    | 5 |
| CPT2     | 1_50946918_56866612    | 5 |
| ERMP1    | 9_5698176_6132947      | 5 |
| ALS2CL   | 3_46444018_47260430    | 5 |
| PELI2    | 14_54206517_56137447   | 5 |
| FRAS1    | 4_77900982_79729996    | 4 |
| ACADM    | 1_74744745_76795860    | 4 |
| FHIT     | 3_61182117_61825173    | 4 |

|           |                        |   |
|-----------|------------------------|---|
| GSTZ1     | 14_75999141_77187926   | 4 |
| HSD17B8   | 6_33129170_33924910    | 4 |
| AUH       | 9_92794541_93245195    | 4 |
| BDKRB2    | 14_95686083_95782529   | 4 |
| RERE      | 1_8088206_9327279      | 4 |
| CTGF      | 6_132285229_134265256  | 4 |
| MYH8      | 17_8232349_10479170    | 4 |
| UGT2A1    | 4_66919436_73663470    | 4 |
| BEND5     | 1_48629900_50703689    | 4 |
| TRPV1     | 17_2508845_3495195     | 4 |
| ARHGEF10L | 1_15686773_22424511    | 4 |
| EPM2A     | 6_143035547_149361903  | 4 |
| ECHDC2    | 1_50946918_56866612    | 4 |
| UNC13B    | 9_33026981_37481279    | 4 |
| DAAM1     | 14_58884793_63484496   | 4 |
| NUDT6     | 4_122282235_124420645  | 4 |
| BSPRY     | 9_114263119_116127884  | 4 |
| GMPR      | 6_14751281_16584906    | 4 |
| SLC35D1   | 1_67217551_68238519    | 4 |
| NELF      | 9_135768997_140273252  | 4 |
| UST       | 6_149361904_150491643  | 4 |
| EGR3      | 8_19651941_25049586    | 4 |
| FAM107A   | 3_58196862_58582663    | 4 |
| GRIK2     | 6_101501741_103932567  | 4 |
| PDZRN3    | 3_73516776_73888656    | 4 |
| FDFT1     | 8_11500453_12651679    | 4 |
| MPP5      | 14_64339460_71326335   | 4 |
| ABHD14A   | 3_51255115_53045501    | 4 |
| SLC25A4   | 4_186002571_187441440  | 4 |
| MRPS2     | 9_135768997_140273252  | 4 |
| ZNF839    | 14_101426228_106368585 | 4 |
| LRRC2     | 3_46444018_47260430    | 4 |
| SUCLG2    | 3_67694975_68692362    | 4 |
| SLC25A11  | 17_4530785_4843681     | 4 |
| SLC22A2   | 6_158136847_161856223  | 4 |
| MFHAS1    | 8_8678669_9179977      | 4 |
| PINK1     | 1_15686773_22424511    | 4 |
| PDSS2     | 6_107742149_108278919  | 4 |
| ID4       | 6_19325516_22859474    | 4 |
| FAAH      | 1_46407796_46674132    | 4 |
| CBR4      | 4_169962502_172505732  | 4 |
| GLRX5     | 14_93396982_95686082   | 4 |
| CISH      | 3_50619138_51255114    | 4 |
| FLRT2     | 14_82987390_86058173   | 4 |
| ACOT7     | 1_5234274_7008096      | 4 |
| C5        | 9_121211372_124547280  | 4 |
| PDZK1IP1  | 1_46674133_48629899    | 4 |

|           |                       |   |
|-----------|-----------------------|---|
| APEH      | 3_47260431_50416574   | 4 |
| EPB49     | 8_19651941_25049586   | 4 |
| GNA14     | 9_78558807_80263106   | 4 |
| PEX3      | 6_143035547_149361903 | 4 |
| DLST      | 14_73418572_74900873  | 4 |
| GADD45A   | 1_67217551_68238519   | 4 |
| FLJ13197  | 4_37643572_38708373   | 4 |
| HLA-DQB1  | 6_32453161_32937691   | 4 |
| DHRS3     | 1_11192383_15337023   | 4 |
| DNAJC6    | 1_65302702_66916347   | 4 |
| HEMK1     | 3_50416575_50619137   | 3 |
| NDRG2     | 14_19487234_20715172  | 3 |
| GALT      | 9_33026981_37481279   | 3 |
| ADRA2C    | 4_2016545_4210963     | 3 |
| RNF186    | 1_15686773_22424511   | 3 |
| KIF1C     | 17_4843682_5610519    | 3 |
| FARS2     | 6_5714705_6983786     | 3 |
| MEG3      | 14_99615311_101426227 | 3 |
| AKR1A1    | 1_44693918_46407795   | 3 |
| C14orf132 | 14_93396982_95686082  | 3 |
| TMEM53    | 1_44693918_46407795   | 3 |
| CTNNBIP1  | 1_9327280_11192382    | 3 |
| ESR1      | 6_152278572_152529522 | 3 |
| DHRS1     | 14_23671158_26484064  | 3 |
| C9orf3    | 9_93245196_98133539   | 3 |
| STAC      | 3_36034756_36652489   | 3 |
| PHF17     | 4_129691789_130292029 | 3 |
| ENPEP     | 4_111388246_115924197 | 3 |
| L2HGDH    | 14_48824296_49922977  | 3 |
| LETM1     | 4_1058778_2016544     | 3 |
| MYO6      | 6_73517512_77532406   | 3 |
| PRKD1     | 14_29270452_31946685  | 3 |
| SRR       | 17_614127_2216518     | 3 |
| WDFY3     | 4_84520712_86736077   | 3 |
| HDCC2     | 6_125566417_129839944 | 3 |
| GPR177    | 1_68238520_71016066   | 3 |
| CLEC3B    | 3_42167330_45192646   | 3 |
| C6orf155  | 6_71624762_73517511   | 3 |
| HMGCL     | 1_22424512_26139846   | 3 |
| CTDSPL    | 3_36652490_39170967   | 3 |
| ACO1      | 9_32156137_33026980   | 3 |
| HS3ST3A1  | 17_12946452_13560670  | 3 |
| ABCD3     | 1_91392051_95193902   | 3 |
| UQCRC1    | 3_47260431_50416574   | 3 |
| FOXC1     | 6_669502_2004108      | 3 |
| ACADVL    | 17_6860981_8232348    | 3 |
| JUN       | 1_57875598_59121115   | 3 |

|          |                       |   |
|----------|-----------------------|---|
| PABPN1   | 14_22352539_23671157  | 3 |
| RDH11    | 14_64339460_71326335  | 3 |
| XPO7     | 8_19651941_25049586   | 3 |
| PALLD    | 4_169962502_172505732 | 3 |
| KANK1    | 9_235706_2386247      | 3 |
| FAM102A  | 9_128950028_132878591 | 3 |
| ACSL1    | 4_185833196_186002570 | 3 |
| ABCG2    | 4_88561174_90727362   | 3 |
| TRIM26   | 6_30062343_31650286   | 3 |
| IGFBP7   | 4_56867718_59055919   | 3 |
| TRIM10   | 6_30062343_31650286   | 3 |
| PGRMC2   | 4_129367365_129691788 | 3 |
| PROSC    | 8_37278312_38706199   | 3 |
| SGSM2    | 17_2216519_2508844    | 3 |
| SHPK     | 17_2508845_3495195    | 3 |
| VPS13D   | 1_11192383_15337023   | 3 |
| ODAM     | 4_66919436_73663470   | 3 |
| AQP7     | 9_33026981_37481279   | 3 |
| SORBS2   | 4_186002571_187441440 | 3 |
| PPP2CB   | 8_30338652_31528878   | 3 |
| CDKN2AIP | 4_184522083_185833195 | 3 |
| CAND2    | 3_11696793_16432447   | 3 |
| SLC25A38 | 3_39170968_40103461   | 3 |
| PPA2     | 4_104359353_111388245 | 3 |
| SFPQ     | 1_34932499_35626743   | 3 |
| SPTAN1   | 9_128950028_132878591 | 3 |
| SURF1    | 9_134370616_135768996 | 3 |
| ENTPD3   | 3_40268801_42167329   | 3 |
| CCDC25   | 8_26497479_28338843   | 3 |
| CLN8     | 8_1171057_1736816     | 3 |
| TCP1     | 6_158136847_161856223 | 3 |
| C3orf14  | 3_62159447_63026381   | 3 |
| DNAJC16  | 1_15686773_22424511   | 3 |
| TSPYL1   | 6_114872044_118823010 | 3 |
| SYNE2    | 14_63484497_64339459  | 3 |
| TBC1D9   | 4_141712454_142983019 | 3 |
| BCL2L2   | 14_22352539_23671157  | 3 |
| CACNA1D  | 3_53045502_54717947   | 3 |
| MAN1A1   | 6_119363250_119977194 | 3 |
| KLF9     | 9_71640847_73014928   | 3 |
| EXOSC7   | 3_42167330_45192646   | 3 |
| HLA-DQA1 | 6_32453161_32937691   | 3 |
| NFIB     | 9_14031071_16025485   | 3 |
| GMNN     | 6_24317865_25076051   | 3 |
| CDC14B   | 9_98133540_98590289   | 3 |
| C1orf175 | 1_50946918_56866612   | 3 |
| HIGD1A   | 3_42167330_45192646   | 3 |

|           |                       |   |
|-----------|-----------------------|---|
| COQ3      | 6_96909533_100648290  | 3 |
| ERLIN2    | 8_37278312_38706199   | 3 |
| ARHGEF3   | 3_56623403_57303906   | 3 |
| ALDH5A1   | 6_24317865_25076051   | 3 |
| SDR39U1   | 14_23671158_26484064  | 3 |
| SMARCA2   | 9_235706_2386247      | 3 |
| USP46     | 4_52393393_53355417   | 3 |
| COQ4      | 9_128950028_132878591 | 3 |
| SYNE1     | 6_152529523_155868712 | 3 |
| CCNG2     | 4_77900982_79729996   | 3 |
| TMEM39B   | 1_30514083_33994396   | 3 |
| PPP1R10   | 6_30062343_31650286   | 3 |
| CALM1     | 14_87472574_91740937  | 3 |
| DBT       | 1_100481889_101337172 | 3 |
| NPY5R     | 4_164283640_164884832 | 3 |
| CCDC90A   | 6_13582256_14751280   | 3 |
| MAP7      | 6_134440866_139197369 | 3 |
| SC4MOL    | 4_165160988_166501453 | 3 |
| TJP2      | 9_71020013_71421560   | 3 |
| ATP1B2    | 17_6860981_8232348    | 3 |
| HSPA4L    | 4_127679018_129120851 | 3 |
| KIAA0664  | 17_2508845_3495195    | 3 |
| LRBA      | 4_150792340_153850509 | 3 |
| NUDT9     | 4_88561174_90727362   | 3 |
| TCEB3     | 1_22424512_26139846   | 3 |
| GPM6A     | 4_172505733_177565763 | 3 |
| VDAC3     | 8_42154137_42971600   | 3 |
| CRYZ      | 1_74744745_76795860   | 3 |
| SGPP1     | 14_58884793_63484496  | 3 |
| C14orf105 | 14_56313752_57267969  | 3 |
| TTRAP     | 6_24317865_25076051   | 3 |
| WDR6      | 3_47260431_50416574   | 3 |
| AKR7A2    | 1_15686773_22424511   | 3 |
| PDHB      | 3_58196862_58582663   | 3 |
| BSDC1     | 1_30514083_33994396   | 3 |
| C6orf26   | 6_31650287_32453160   | 3 |
| COQ6      | 14_73418572_74900873  | 3 |
| CIDEB     | 14_23671158_26484064  | 3 |
| PLA2G12A  | 4_104359353_111388245 | 3 |
| SNCA      | 4_90727363_91299620   | 3 |
| PLCL2     | 3_16432448_20354080   | 3 |
| KIAA0317  | 14_73418572_74900873  | 3 |
| RPH3AL    | 17_6888_595981        | 3 |
| HMBOX1    | 8_28711850_29940701   | 3 |
| NRG1      | 8_31953465_33012862   | 3 |
| DDR1      | 6_30062343_31650286   | 3 |
| SSBP3     | 1_50946918_56866612   | 3 |

|           |                       |   |
|-----------|-----------------------|---|
| BTD       | 3_11696793_16432447   | 3 |
| SCAP      | 3_47260431_50416574   | 3 |
| DDO       | 6_110609524_111976782 | 3 |
| SERPINA4  | 14_93396982_95686082  | 3 |
| C14orf159 | 14_87472574_91740937  | 3 |
| FERMT2    | 14_51083761_52877458  | 3 |
| SRPK1     | 6_35815668_37651501   | 3 |
| POMT1     | 9_132878592_134370615 | 3 |
| HECTD3    | 1_44693918_46407795   | 3 |
| RGP1      | 9_33026981_37481279   | 3 |
| CRAT      | 9_128950028_132878591 | 3 |
| THTPA     | 14_22352539_23671157  | 3 |
| RNF146    | 6_125566417_129839944 | 3 |
| CCL19     | 9_33026981_37481279   | 3 |
| BAG1      | 9_33026981_37481279   | 3 |
| ZNF184    | 6_26855017_28440431   | 3 |
| UBE4B     | 1_9327280_11192382    | 3 |
| GMPR2     | 14_23671158_26484064  | 3 |
| ADH5      | 4_92137112_101656701  | 3 |
| NISCH     | 3_51255115_53045501   | 3 |
| RRAGD     | 6_87310214_90201824   | 3 |
| MYL3      | 3_46444018_47260430   | 3 |
| LARS2     | 3_45192647_46036843   | 3 |
| TEX264    | 3_51255115_53045501   | 3 |
| IL11RA    | 9_33026981_37481279   | 3 |
| DAG1      | 3_47260431_50416574   | 3 |
| IFT74     | 9_24933020_27532408   | 3 |
| ECHDC1    | 6_125566417_129839944 | 3 |
| CCL21     | 9_33026981_37481279   | 3 |
| SETMAR    | 3_4214325_7558057     | 3 |
| MAP9      | 4_156214823_158210878 | 3 |
| MYOM2     | 8_1736817_2536923     | 3 |
| CASP9     | 1_15686773_22424511   | 3 |
| ZBTB40    | 1_22424512_26139846   | 3 |
| EFS       | 14_22352539_23671157  | 3 |
| GK3P      | 4_165160988_166501453 | 3 |
| C14orf1   | 14_74900874_75787875  | 3 |
| LMO4      | 1_87484343_88294003   | 3 |
| EVI5      | 1_91392051_95193902   | 2 |
| LRRC8D    | 1_89330691_91276782   | 2 |
| ZBTB43    | 9_125110448_128950027 | 2 |
| KIF1B     | 1_9327280_11192382    | 2 |
| ZDHHC3    | 3_42167330_45192646   | 2 |
| LAMC3     | 9_132878592_134370615 | 2 |
| ICMT      | 1_5234274_7008096     | 2 |
| RPAP2     | 1_91392051_95193902   | 2 |
| RAB15     | 14_64339460_71326335  | 2 |



|           |                       |   |
|-----------|-----------------------|---|
| HSDL2     | 9_114263119_116127884 | 2 |
| MGST2     | 4_140832070_141712453 | 2 |
| PDLIM5    | 4_92137112_101656701  | 2 |
| ATP5S     | 14_48824296_49922977  | 2 |
| DNAJC11   | 1_5234274_7008096     | 2 |
| DACT1     | 14_57267970_58282421  | 2 |
| SRGAP3    | 3_9136375_9530422     | 2 |
| MAPKAP1   | 9_125110448_128950027 | 2 |
| UBR4      | 1_15686773_22424511   | 2 |
| THAP1     | 8_42154137_42971600   | 2 |
| CTAGE5    | 14_38581192_39249068  | 2 |
| SYNJ2BP   | 14_64339460_71326335  | 2 |
| MUTYH     | 1_44693918_46407795   | 2 |
| TNFSF15   | 9_116141066_118287665 | 2 |
| PIGH      | 14_64339460_71326335  | 2 |
| MAP3K7IP2 | 6_149361904_150491643 | 2 |
| EXTL2     | 1_100481889_101337172 | 2 |
| CRK       | 17_614127_2216518     | 2 |
| PAFAH2    | 1_26139847_27048705   | 2 |
| ATXN7     | 3_63312900_63995486   | 2 |
| COX16     | 14_64339460_71326335  | 2 |
| BTBD7     | 14_92414584_93396981  | 2 |
| CACNA2D2  | 3_50416575_50619137   | 2 |
| CDKL1     | 14_49922978_50527462  | 2 |
| CYP46A1   | 14_97993083_99353000  | 2 |
| CCDC28A   | 6_134440866_139197369 | 2 |
| SFN       | 1_27048706_27721886   | 2 |
| RNF38     | 9_33026981_37481279   | 2 |
| SPEN      | 1_15686773_22424511   | 2 |
| GOLGA7    | 8_41063273_41698554   | 2 |
| GORASP1   | 3_36652490_39170967   | 2 |
| TNXA      | 6_31650287_32453160   | 2 |
| NOL7      | 6_13582256_14751280   | 2 |
| CDA       | 1_15686773_22424511   | 2 |
| MUDENG    | 14_56313752_57267969  | 2 |
| TSPYL4    | 6_114872044_118823010 | 2 |
| XYLB      | 3_36652490_39170967   | 2 |
| STX18     | 4_4210964_4783650     | 2 |
| CCNC      | 6_96909533_100648290  | 2 |
| CCDC51    | 3_47260431_50416574   | 2 |
| DHRS7     | 14_58884793_63484496  | 2 |
| PPT2      | 6_31650287_32453160   | 2 |
| ATPIF1    | 1_27721887_29059445   | 2 |
| CDC37L1   | 9_2386248_4838874     | 2 |
| ZKSCAN3   | 6_28440432_29834024   | 2 |
| FBXO34    | 14_54206517_56137447  | 2 |
| HIST1H4A  | 6_25679405_26855016   | 2 |

|           |                        |   |
|-----------|------------------------|---|
| PET112L   | 4_150792340_153850509  | 2 |
| HABP4     | 9_98133540_98590289    | 2 |
| NUP210    | 3_11696793_16432447    | 2 |
| BAP1      | 3_51255115_53045501    | 2 |
| KIAA0562  | 1_3395156_3980623      | 2 |
| SMARCC1   | 3_47260431_50416574    | 2 |
| VAV3      | 1_101337173_109048825  | 2 |
| PPP1R13B  | 14_101426228_106368585 | 2 |
| FZD3      | 8_28371790_28711849    | 2 |
| C6orf123  | 6_167747798_168350056  | 2 |
| SAV1      | 14_49922978_50527462   | 2 |
| NAT1      | 8_18110406_18165709    | 2 |
| LRPAP1    | 4_2016545_4210963      | 2 |
| PRKCD     | 3_53045502_54717947    | 2 |
| ABCA11P   | 4_234361_1058777       | 2 |
| DDAH2     | 6_31650287_32453160    | 2 |
| APITD1    | 1_9327280_11192382     | 2 |
| NUP88     | 17_4843682_5610519     | 2 |
| KLHDC2    | 14_48824296_49922977   | 2 |
| LGSN      | 6_62844345_67065774    | 2 |
| VAMP2     | 17_6860981_8232348     | 2 |
| KIAA0494  | 1_46674133_48629899    | 2 |
| XPC       | 3_11696793_16432447    | 2 |
| SFRS4     | 1_29095964_29845135    | 2 |
| KLHL2     | 4_165160988_166501453  | 2 |
| CCBL2     | 1_88618082_89330690    | 2 |
| PIGV      | 1_26139847_27048705    | 2 |
| SARDH     | 9_134370616_135768996  | 2 |
| ANKS1A    | 6_33924911_35815667    | 2 |
| MTMR9     | 8_10883891_11500452    | 2 |
| TUSC2     | 3_47260431_50416574    | 2 |
| ARID1A    | 1_26139847_27048705    | 2 |
| SLC22A3   | 6_158136847_161856223  | 2 |
| BRD3      | 9_135768997_140273252  | 2 |
| TCTA      | 3_47260431_50416574    | 2 |
| ABHD4     | 14_21962301_22172808   | 2 |
| ATP6V1D   | 14_64339460_71326335   | 2 |
| SLC22A17  | 14_22352539_23671157   | 2 |
| MAPK1IP1L | 14_54206517_56137447   | 2 |
| PDLIM2    | 8_19651941_25049586    | 2 |
| PARK2     | 6_162832504_164136229  | 2 |
| ENG       | 9_128950028_132878591  | 2 |
| C9orf9    | 9_134370616_135768996  | 2 |
| CCBL1     | 9_128950028_132878591  | 2 |
| TRAK1     | 3_42167330_45192646    | 2 |
| LMBRD1    | 6_69793498_71624761    | 2 |
| SEPT11    | 4_77900982_79729996    | 2 |

|           |                        |   |
|-----------|------------------------|---|
| DAPK1     | 9_89156787_90443785    | 2 |
| LSM1      | 8_37278312_38706199    | 2 |
| TSC1      | 9_134370616_135768996  | 2 |
| SFRS18    | 6_96909533_100648290   | 2 |
| RNMTL1    | 17_614127_2216518      | 2 |
| ITPK1     | 14_92414584_93396981   | 2 |
| RNF170    | 8_42154137_42971600    | 2 |
| SLC17A5   | 6_73517512_77532406    | 2 |
| PAFAH1B1  | 17_2508845_3495195     | 2 |
| KIAA0284  | 14_101426228_106368585 | 2 |
| SF3B5     | 6_143035547_149361903  | 2 |
| ALAS1     | 3_51255115_53045501    | 2 |
| GSR       | 8_30338652_31528878    | 2 |
| IQSEC1    | 3_11696793_16432447    | 2 |
| EIF5      | 14_101426228_106368585 | 2 |
| CHD3      | 17_6860981_8232348     | 2 |
| BRD2      | 6_33009912_33129169    | 2 |
| ZER1      | 9_128950028_132878591  | 2 |
| CCNB1IP1  | 14_19487234_20715172   | 2 |
| FAM86B1   | 8_11500453_12651679    | 2 |
| C14orf147 | 14_33309047_38581191   | 2 |
| DHX16     | 6_30062343_31650286    | 2 |
| FANCC     | 9_93245196_98133539    | 2 |
| SH3GLB2   | 9_128950028_132878591  | 2 |
| SLC25A20  | 3_47260431_50416574    | 2 |
| ADD1      | 4_2016545_4210963      | 2 |
| PRPF4B    | 6_2755768_5403145      | 2 |
| ZNF232    | 17_4843682_5610519     | 2 |
| PPM1A     | 14_58884793_63484496   | 2 |
| SETD3     | 14_97993083_99353000   | 2 |
| ACAT2     | 6_158136847_161856223  | 2 |
| C1orf144  | 1_15686773_22424511    | 2 |
| DIO2      | 14_77194224_82987389   | 2 |
| CPNE6     | 14_22352539_23671157   | 2 |
| LYPLA2    | 1_22424512_26139846    | 2 |
| STK38     | 6_35815668_37651501    | 2 |
| SPP1      | 4_88561174_90727362    | 2 |
| NAT2      | 8_18165710_18350096    | 2 |
| PLEKHG3   | 14_63484497_64339459   | 2 |
| IPP       | 1_44693918_46407795    | 2 |
| MTHFD1    | 14_63484497_64339459   | 2 |
| PLCD1     | 3_36652490_39170967    | 2 |
| GAK       | 4_234361_1058777       | 2 |
| PHACTR4   | 1_27721887_29059445    | 2 |
| GABBR1    | 6_28440432_29834024    | 2 |
| NACC2     | 9_135768997_140273252  | 2 |
| C6orf120  | 6_168350057_170290623  | 2 |

|          |                        |   |
|----------|------------------------|---|
| COX7A2   | 6_73517512_77532406    | 2 |
| SEC16A   | 9_135768997_140273252  | 2 |
| C14orf2  | 14_101426228_106368585 | 2 |
| PITPNA   | 17_614127_2216518      | 2 |
| TMEM158  | 3_45192647_46036843    | 2 |
| CTNS     | 17_3495196_4530784     | 2 |
| SCP2     | 1_50946918_56866612    | 2 |
| AHDC1    | 1_27721887_29059445    | 2 |
| LSM3     | 3_11696793_16432447    | 2 |
| HSP90AA1 | 14_101426228_106368585 | 2 |
| BCAR3    | 1_91392051_95193902    | 2 |
| SURF2    | 9_134370616_135768996  | 2 |
| TSR1     | 17_614127_2216518      | 2 |
| NRN1     | 6_5714705_6983786      | 2 |
| P4HTM    | 3_47260431_50416574    | 2 |
| GPBP1L1  | 1_44693918_46407795    | 2 |
| MEGF9    | 9_121211372_124547280  | 2 |
| MBIP     | 14_33309047_38581191   | 2 |
| PRPF8    | 17_614127_2216518      | 2 |
| MDC1     | 6_30062343_31650286    | 2 |
| RAB14    | 9_121211372_124547280  | 2 |
| OSBPL9   | 1_50946918_56866612    | 2 |
| PKD2     | 4_88561174_90727362    | 2 |
| LTB      | 6_31650287_32453160    | 2 |
| GLOD4    | 17_614127_2216518      | 2 |

---

**Table S6. Genes determined to be gained and overexpressed in both the Penn Data and Broad Data**

| <b>Gene</b> | <b>Segment</b>        | <b>Expression fold change</b> |
|-------------|-----------------------|-------------------------------|
| NPTX2       | 7_97491747_98142731   | 158                           |
| FABP6       | 5_158186648_159550735 | 39                            |
| LOX         | 5_121379525_121463477 | 32                            |
| EZH2        | 7_147743920_148251513 | 26                            |
| TGFBI       | 5_133869574_135609557 | 26                            |
| LPCAT1      | 5_1464412_1547908     | 25                            |
| STC2        | 5_172627142_172911788 | 20                            |
| VCAN        | 5_82429444_83404045   | 19                            |
| HAPLN1      | 5_82429444_83404045   | 18                            |
| PTTG1       | 5_159560586_159794152 | 13                            |
| SLC1A3      | 5_36083295_38914974   | 12                            |
| CD36        | 7_79232817_81720844   | 12                            |
| FYB         | 5_38914975_40803153   | 11                            |
| HAVCR1      | 5_153318241_156728896 | 11                            |
| LCP2        | 5_169013893_171206829 | 11                            |
| ERAP2       | 5_95185578_96572060   | 10                            |
| LHFPL2      | 5_77424969_79064481   | 10                            |
| CDH6        | 5_31118743_31275604   | 10                            |
| SERPINE1    | 7_99477381_101064053  | 9                             |
| OSMR        | 5_36083295_38914974   | 9                             |
| ADCY2       | 5_6955045_7595315     | 8                             |
| NCAPG2      | 7_155325076_158821424 | 7                             |
| IL7R        | 5_35072475_35904253   | 6                             |
| TNFAIP8     | 5_117428678_119347308 | 6                             |
| GM2A        | 5_150387976_151495148 | 5                             |
| ERAP1       | 5_95185578_96572060   | 5                             |
| TRIO        | 5_13360088_14372070   | 5                             |
| LMNB1       | 5_124312152_126219449 | 5                             |
| SEMA6A      | 5_114787094_117418456 | 4                             |
| MAP1B       | 5_71090060_73266816   | 4                             |
| PDIA4       | 7_148251514_148521023 | 4                             |
| FAM134B     | 5_15838038_17095203   | 4                             |
| ARHGAP26    | 5_137965436_142619254 | 4                             |
| FEM1C       | 5_114787094_117418456 | 4                             |
| MCTP1       | 5_93800373_94108870   | 4                             |
| PDCD6       | 5_80564_1460115       | 4                             |
| NAIP        | 5_80564_1460115       | 4                             |
| HEXB        | 5_74004814_74111113   | 3                             |
| PRRC1       | 5_126472912_127898523 | 3                             |
| THG1L       | 5_156728897_158181852 | 3                             |
| TMED9       | 5_175848855_177323654 | 3                             |
| NR3C1       | 5_142619255_142995861 | 3                             |
| ELL2        | 5_95185578_96572060   | 3                             |
| ABLIM3      | 5_148125331_149600863 | 3                             |

|         |                       |   |
|---------|-----------------------|---|
| FAF2    | 5_174398116_175825668 | 3 |
| UBE2D2  | 5_137965436_142619254 | 3 |
| POLR3G  | 5_89715117_90038886   | 3 |
| CD74    | 5_149608837_150339149 | 3 |
| ATG12   | 5_114787094_117418456 | 3 |
| DNAJB6  | 7_155325076_158821424 | 3 |
| NPM1    | 5_169013893_171206829 | 3 |
| RHEB    | 7_150769315_150816588 | 3 |
| CSNK1A1 | 5_148125331_149600863 | 3 |
| POP7    | 7_99477381_101064053  | 3 |
| CAST    | 5_95185578_96572060   | 2 |
| TCERG1  | 5_145777678_145959815 | 2 |
| AP3S1   | 5_114787094_117418456 | 2 |
| KIF3A   | 5_131895601_132064150 | 2 |
| SLC36A1 | 5_150387976_151495148 | 2 |
| MTRR    | 5_7595316_8756147     | 2 |
| RAPGEF6 | 5_130783666_130814765 | 2 |
| BAZ1B   | 7_71542285_73758949   | 2 |
| PRKAA1  | 5_38914975_40803153   | 2 |
| NOP16   | 5_174398116_175825668 | 2 |
| YIPF5   | 5_142995862_144127403 | 2 |
| MFAP3   | 5_153318241_156728896 | 2 |
| GTF2H2B | 5_80564_1460115       | 2 |
| CSNK1G3 | 5_122532465_123412098 | 2 |
| LNPEP   | 5_95185578_96572060   | 2 |
| PDLIM4  | 5_131528076_131643864 | 2 |
| ABCF2   | 7_150298143_150766389 | 2 |
| SKP2    | 5_36083295_38914974   | 2 |

---

**Table S7. Genes determined to be lost and underexpressed in both the Penn Data and Broad Data**

| <b>Gene</b> | <b>Segment</b>        | <b>Expression<br/>fold change</b> |
|-------------|-----------------------|-----------------------------------|
| ALDOB       | 9_103206143_103225078 | 3302                              |
| LPA         | 6_159653684_161058906 | 258                               |
| PLG         | 6_159653684_161058906 | 248                               |
| SERPINA5    | 14_91904853_94123764  | 140                               |
| PTH1R       | 3_44897145_49188640   | 87                                |
| SLC7A8      | 14_22048600_22665560  | 79                                |
| FBP1        | 9_95018086_97600430   | 60                                |
| TRPM3       | 9_71621900_72807090   | 38                                |
| LRRC19      | 9_26297529_27664431   | 36                                |
| TYRP1       | 9_12500515_12697860   | 29                                |
| PTPRD       | 9_8270950_8423044     | 26                                |
| CHL1        | 3_135814_442156       | 26                                |
| TCF21       | 6_133557295_134979912 | 25                                |
| FBLN5       | 14_91313036_91496974  | 25                                |
| ARG2        | 14_66925080_67888728  | 24                                |
| ACOX2       | 3_58186123_58682005   | 23                                |
| TMEM30B     | 14_60386017_61188235  | 23                                |
| ASS1        | 9_132265469_132463966 | 20                                |
| ACY1        | 3_49220649_53001753   | 20                                |
| SEMA3B      | 3_49220649_53001753   | 19                                |
| ALDH6A1     | 14_73538366_75214580  | 19                                |
| EPB41L4B    | 9_110686804_112024713 | 19                                |
| TPD52L1     | 6_124730454_126264765 | 19                                |
| ALDH8A1     | 6_134990236_136274372 | 18                                |
| PCK2        | 14_23452745_23973123  | 17                                |
| GLDC        | 9_5171467_6962164     | 15                                |
| PSAT1       | 9_79879810_80205963   | 14                                |
| IL17RB      | 3_53179885_54098050   | 13                                |
| RALGPS1     | 9_128580791_129662766 | 12                                |
| SH3GL2      | 9_16855699_17606192   | 12                                |
| VNN1        | 6_132861486_133539012 | 12                                |
| TEK         | 9_26297529_27664431   | 12                                |
| PIP5K1B     | 9_70233709_71617302   | 10                                |
| HSPA2       | 14_63745851_64141947  | 10                                |
| MST1        | 3_49220649_53001753   | 9                                 |
| GAS1        | 9_87649884_89304565   | 9                                 |
| NTRK2       | 9_85941187_87593031   | 9                                 |
| ACAA1       | 3_37967544_38537395   | 8                                 |
| DNASE1L3    | 3_57884298_58173754   | 8                                 |
| TDGF1       | 3_44897145_49188640   | 8                                 |
| PLXNB1      | 3_44897145_49188640   | 8                                 |
| CLMN        | 14_94128490_96240501  | 8                                 |
| ALAD        | 9_115037070_115782034 | 8                                 |
| SLC7A7      | 14_22048600_22665560  | 8                                 |

|         |                        |   |
|---------|------------------------|---|
| HDHD3   | 9_115037070_115782034  | 7 |
| GPD1L   | 3_30861158_34026328    | 7 |
| GPHN    | 14_65941325_66596885   | 7 |
| DHRS4   | 14_23452745_23973123   | 6 |
| FOS     | 14_73538366_75214580   | 6 |
| CTNNAL1 | 9_110686804_112024713  | 6 |
| ACOT1   | 14_72413330_73197695   | 6 |
| OGG1    | 3_9737595_11040806     | 6 |
| KCNK10  | 14_87688655_87991468   | 6 |
| BCKDHB  | 6_79436179_81341225    | 6 |
| AQP3    | 9_33069023_34267052    | 6 |
| GCH1    | 14_53873515_54481493   | 5 |
| PTPN3   | 9_110686804_112024713  | 5 |
| PEX7    | 6_136867990_137635448  | 5 |
| BRP44L  | 6_165958177_167074864  | 5 |
| TBC1D13 | 9_130329421_131084190  | 5 |
| SLC26A6 | 3_44897145_49188640    | 5 |
| GRHPR   | 9_37085008_38426991    | 5 |
| SLC1A1  | 9_4428585_4696365      | 5 |
| NP      | 14_19722395_21117922   | 5 |
| FAM184A | 6_117963452_119451227  | 5 |
| AMT     | 3_49220649_53001753    | 5 |
| SOBP    | 6_107556334_108718558  | 5 |
| CTSL2   | 9_98591458_99015826    | 5 |
| CKB     | 14_102698491_103162541 | 5 |
| RGS3    | 9_115037070_115782034  | 5 |
| ENPP1   | 6_131763569_132304683  | 5 |
| HYAL1   | 3_49220649_53001753    | 5 |
| ALS2CL  | 3_44897145_49188640    | 5 |
| FHIT    | 3_59641041_60037675    | 4 |
| GSTZ1   | 14_75364277_77059690   | 4 |
| AUH     | 9_92877674_93702294    | 4 |
| BDKRB2  | 14_94128490_96240501   | 4 |
| CTGF    | 6_132307358_132574240  | 4 |
| UNC13B  | 9_34490610_35516604    | 4 |
| BSPRY   | 9_115037070_115782034  | 4 |
| FAM107A | 3_58186123_58682005    | 4 |
| ABHD14A | 3_49220649_53001753    | 4 |
| ZNF839  | 14_100344336_102698490 | 4 |
| SUCLG2  | 3_66911946_67923826    | 4 |
| GLRX5   | 14_94128490_96240501   | 4 |
| CISH    | 3_49220649_53001753    | 4 |
| FLRT2   | 14_84926602_85186475   | 4 |
| C5      | 9_122162008_124248881  | 4 |
| APEH    | 3_49220649_53001753    | 4 |
| GNA14   | 9_78471939_79873671    | 4 |
| DLST    | 14_73538366_75214580   | 4 |



|           |                       |   |
|-----------|-----------------------|---|
| HEMK1     | 3_49220649_53001753   | 3 |
| NDRG2     | 14_19722395_21117922  | 3 |
| GALT      | 9_34490610_35516604   | 3 |
| DHRS1     | 14_23452745_23973123  | 3 |
| C9orf3    | 9_95018086_97600430   | 3 |
| L2HGDH    | 14_49764449_50156136  | 3 |
| CLEC3B    | 3_44897145_49188640   | 3 |
| CTDSPL    | 3_37419138_37957464   | 3 |
| ACO1      | 9_32372071_32379397   | 3 |
| UQCRC1    | 3_44897145_49188640   | 3 |
| PABPN1    | 14_22668792_23199978  | 3 |
| RDH11     | 14_66925080_67888728  | 3 |
| FAM102A   | 9_129662767_130209348 | 3 |
| AQP7      | 9_33069023_34267052   | 3 |
| SLC25A38  | 3_39227673_39883848   | 3 |
| SPTAN1    | 9_130329421_131084190 | 3 |
| C3orf14   | 3_61813487_62538927   | 3 |
| SYNE2     | 14_62827859_63745850  | 3 |
| BCL2L2    | 14_22668792_23199978  | 3 |
| KLF9      | 9_71621900_72807090   | 3 |
| EXOSC7    | 3_44897145_49188640   | 3 |
| CDC14B    | 9_97608364_98577589   | 3 |
| HIGD1A    | 3_42343012_43143225   | 3 |
| SDR39U1   | 14_23973124_24015170  | 3 |
| SMARCA2   | 9_1477108_2200546     | 3 |
| COQ4      | 9_129662767_130209348 | 3 |
| SYNE1     | 6_152461219_152577227 | 3 |
| CALM1     | 14_88531099_90228621  | 3 |
| TJP2      | 9_70233709_71617302   | 3 |
| PDHB      | 3_58186123_58682005   | 3 |
| KIAA0317  | 14_73538366_75214580  | 3 |
| BTD       | 3_15026132_16085669   | 3 |
| SCAP      | 3_44897145_49188640   | 3 |
| DDO       | 6_109168061_112756362 | 3 |
| C14orf159 | 14_90234219_91313035  | 3 |
| POMT1     | 9_132994733_133426100 | 3 |
| CRAT      | 9_130329421_131084190 | 3 |
| THTPA     | 14_22668792_23199978  | 3 |
| BAG1      | 9_33069023_34267052   | 3 |
| GMPR2     | 14_23452745_23973123  | 3 |
| NISCH     | 3_49220649_53001753   | 3 |
| RRAGD     | 6_89266711_90133403   | 3 |
| LARS2     | 3_44897145_49188640   | 3 |
| TEX264    | 3_49220649_53001753   | 3 |
| DAG1      | 3_49220649_53001753   | 3 |
| C14orf1   | 14_73538366_75214580  | 3 |
| ZDHC3     | 3_44897145_49188640   | 2 |

|           |                        |   |
|-----------|------------------------|---|
| LAMC3     | 9_132476485_132985779  | 2 |
| RAB15     | 14_64373004_64780332   | 2 |
| MAPKAP1   | 9_127035418_127435933  | 2 |
| PIGH      | 14_66925080_67888728   | 2 |
| COX16     | 14_68301617_69955784   | 2 |
| CACNA2D2  | 3_49220649_53001753    | 2 |
| CCDC28A   | 6_138842339_139665700  | 2 |
| RNF38     | 9_35523348_37085007    | 2 |
| GORASP1   | 3_38618283_39223855    | 2 |
| MUDENG    | 14_55049506_57672302   | 2 |
| CCNC      | 6_97422999_100838999   | 2 |
| CCDC51    | 3_44897145_49188640    | 2 |
| DHRS7     | 14_59453438_60386016   | 2 |
| FBXO34    | 14_54579863_55048577   | 2 |
| NUP210    | 3_12915346_14322584    | 2 |
| BAP1      | 3_49220649_53001753    | 2 |
| SMARCC1   | 3_44897145_49188640    | 2 |
| KLHDC2    | 14_49275523_49764448   | 2 |
| XPC       | 3_12915346_14322584    | 2 |
| TUSC2     | 3_49220649_53001753    | 2 |
| TCTA      | 3_49220649_53001753    | 2 |
| ABHD4     | 14_22048600_22665560   | 2 |
| ATP6V1D   | 14_66874128_66925079   | 2 |
| MAPK1IP1L | 14_54579863_55048577   | 2 |
| ENG       | 9_128580791_129662766  | 2 |
| CCBL1     | 9_130329421_131084190  | 2 |
| TRAK1     | 3_40062985_42196550    | 2 |
| LMBRD1    | 6_70369272_70785392    | 2 |
| SLC17A5   | 6_74286513_74830132    | 2 |
| KIAA0284  | 14_103638225_104746745 | 2 |
| SF3B5     | 6_144123302_144707049  | 2 |
| ALAS1     | 3_49220649_53001753    | 2 |
| IQSEC1    | 3_12903762_12915345    | 2 |
| EIF5      | 14_102698491_103162541 | 2 |
| ZER1      | 9_130329421_131084190  | 2 |
| CCNB1IP1  | 14_19722395_21117922   | 2 |
| C14orf147 | 14_32812162_34288375   | 2 |
| SH3GLB2   | 9_130329421_131084190  | 2 |
| SLC25A20  | 3_44897145_49188640    | 2 |
| PPM1A     | 14_59453438_60386016   | 2 |
| PLEKHG3   | 14_64141948_64362422   | 2 |
| MTHFD1    | 14_63745851_64141947   | 2 |
| PLCD1     | 3_37967544_38537395    | 2 |
| COX7A2    | 6_74875451_77396866    | 2 |
| C14orf2   | 14_103218092_103635871 | 2 |
| LSM3      | 3_12915346_14322584    | 2 |
| P4HTM     | 3_44897145_49188640    | 2 |

|       |                       |   |
|-------|-----------------------|---|
| MEGF9 | 9_122162008_124248881 | 2 |
| RAB14 | 9_122162008_124248881 | 2 |

---

**Table S8. Genes determined to be gained and overexpressed specifically in the H1H2 tumors**

| <b>Gene</b> | <b>Segment</b>       | <b>Expression<br/>fold change</b> |
|-------------|----------------------|-----------------------------------|
| TPM4        | 19_15966270_17119827 | 110                               |
| AP3D1       | 19_1877027_2257574   | 67                                |
| GADD45B     | 19_2303639_2434712   | 40                                |
| UBE2I       | 16_37354_1504823     | 30                                |
| C16orf42    | 16_37354_1504823     | 16                                |
| LSM4        | 19_17510791_19739813 | 13                                |
| PDPK1       | 16_2497499_2582218   | 13                                |
| PSMA7       | 20_59810422_60201891 | 13                                |
| RPS21       | 20_60211696_60452531 | 12                                |
| RAB22A      | 20_56098218_56737667 | 12                                |
| AURKA       | 20_54246466_54448572 | 12                                |
| KIR2DS5     | 19_217034_569158     | 10                                |
| FPR3        | 19_56951383_57293210 | 9                                 |
| SLMO2       | 20_56752189_57794009 | 8                                 |
| STX16       | 20_56098218_56737667 | 8                                 |
| CDK10       | 16_86889141_88827254 | 7                                 |
| ANKRD11     | 16_86889141_88827254 | 7                                 |
| KLHDC4      | 16_86213716_86327204 | 7                                 |
| RAE1        | 20_55323457_55373335 | 7                                 |
| HN1L        | 16_1504824_1747780   | 6                                 |
| PRPF6       | 20_60513032_62435964 | 6                                 |
| MUM1        | 19_685851_1501649    | 5                                 |
| LUC7L       | 16_37354_1504823     | 4                                 |
| FOXF1       | 16_84978771_85883412 | 4                                 |
| YTHDF1      | 20_60513032_62435964 | 4                                 |
| APRT        | 16_86889141_88827254 | 4                                 |
| C19orf6     | 19_685851_1501649    | 4                                 |
| KIR2DS1     | 19_217034_569158     | 4                                 |
| ZNF350      | 19_56951383_57293210 | 4                                 |
| DIDO1       | 20_60513032_62435964 | 4                                 |
| NFIC        | 19_3207206_3806976   | 3                                 |
| GNAS        | 20_56752189_57794009 | 3                                 |
| CTSZ        | 20_56752189_57794009 | 3                                 |
| TCF25       | 16_86889141_88827254 | 3                                 |
| MKNK2       | 19_1877027_2257574   | 3                                 |
| C19orf24    | 19_685851_1501649    | 3                                 |
| SF4         | 19_17510791_19739813 | 3                                 |
| USE1        | 19_17140752_17510790 | 3                                 |
| DEF8        | 16_86889141_88827254 | 3                                 |
| TICAM1      | 19_4383973_5333471   | 3                                 |
| ABCA3       | 16_2203147_2269261   | 3                                 |
| BIRC7       | 20_60513032_62435964 | 2                                 |
| GTPBP3      | 19_17140752_17510790 | 2                                 |
| PMEPA1      | 20_55378086_56088765 | 2                                 |

|        |                       |   |
|--------|-----------------------|---|
| SFRS14 | 19_17510791_19739813  | 2 |
| RMND5B | 5_177328806_177539024 | 2 |
| DDX49  | 19_17510791_19739813  | 2 |
| RNF126 | 19_580303_681234      | 2 |

---

**Table S9. Genes determined to be lost and underexpressed specifically in the H1H2 tumors**

| <b>Gene</b> | <b>Segment</b>         | <b>Expression fold change</b> |
|-------------|------------------------|-------------------------------|
| ALDOB       | 9_103206143_103225078  | 1328                          |
| GLDC        | 9_5171467_6962164      | 80                            |
| ADD3        | 10_111599600_112749597 | 56                            |
| PLG         | 6_159653684_161058906  | 52                            |
| LPA         | 6_159653684_161058906  | 36                            |
| NR4A3       | 9_101056712_102392837  | 30                            |
| SLC1A1      | 9_4428585_4696365      | 29                            |
| ALDH8A1     | 6_134990236_136274372  | 28                            |
| PTPN3       | 9_110686804_112024713  | 23                            |
| SF3B5       | 6_144123302_144707049  | 22                            |
| NTRK2       | 9_85941187_87593031    | 21                            |
| LMBRD1      | 6_70369272_70785392    | 17                            |
| TPD52L1     | 6_124730454_126264765  | 16                            |
| PSAT1       | 9_79879810_80205963    | 16                            |
| CTNNAL1     | 9_110686804_112024713  | 15                            |
| KLF4        | 9_108878798_110682355  | 14                            |
| TCF21       | 6_133557295_134979912  | 12                            |
| DUSP5       | 10_111599600_112749597 | 12                            |
| CITED2      | 6_139666937_140225385  | 11                            |
| MAP3K4      | 6_161064719_162208527  | 10                            |
| CDC2L6      | 6_109168061_112756362  | 10                            |
| IFIT3       | 10_90957073_91340766   | 10                            |
| PEX7        | 6_136867990_137635448  | 9                             |
| TCTN3       | 10_95422852_97564644   | 9                             |
| SNX3        | 6_107556334_108718558  | 9                             |
| GNA14       | 9_78471939_79873671    | 9                             |
| C9orf46     | 9_5171467_6962164      | 8                             |
| TRPM3       | 9_71621900_72807090    | 7                             |
| ZDHHC6      | 10_114129886_115474189 | 6                             |
| EPB41L4B    | 9_110686804_112024713  | 6                             |
| AIM1        | 6_107027893_107082228  | 6                             |
| PTPRD       | 9_8270950_8423044      | 6                             |
| C9orf95     | 9_76597456_77301249    | 6                             |
| SH3GL2      | 9_16855699_17606192    | 6                             |
| AKAP12      | 6_150013780_151967069  | 6                             |
| SYNJ2       | 6_157357403_158508689  | 6                             |
| RPS12       | 6_132861486_133539012  | 6                             |
| AKAP7       | 6_130174709_131753350  | 6                             |
| FAM184A     | 6_117963452_119451227  | 5                             |
| SMARCA2     | 9_1477108_2200546      | 5                             |
| MOXD1       | 6_132576345_132753999  | 5                             |
| ABCA1       | 9_106576716_106585723  | 5                             |
| VNN1        | 6_132861486_133539012  | 5                             |
| C5          | 9_122162008_124248881  | 5                             |

|          |                        |   |
|----------|------------------------|---|
| NDUFA8   | 9_122162008_124248881  | 5 |
| DENND4C  | 9_19280143_19432557    | 5 |
| PDE10A   | 6_164518210_165829451  | 4 |
| SMPD2    | 6_109168061_112756362  | 4 |
| FYN      | 6_109168061_112756362  | 4 |
| PIP5K1B  | 9_70233709_71617302    | 4 |
| SASH1    | 6_148191120_148971559  | 4 |
| RNGTT    | 6_89266711_90133403    | 4 |
| XPNPEP1  | 10_111599600_112749597 | 4 |
| SLC17A5  | 6_74286513_74830132    | 4 |
| RAB14    | 9_122162008_124248881  | 4 |
| QRSL1    | 6_107087017_107515277  | 4 |
| FIG4     | 6_109168061_112756362  | 4 |
| KLHL9    | 9_20807835_21445813    | 4 |
| ALDH18A1 | 10_95422852_97564644   | 4 |
| KIAA0020 | 9_2559655_2952417      | 4 |
| DDO      | 6_109168061_112756362  | 4 |
| LRRC19   | 9_26297529_27664431    | 3 |
| CCNC     | 6_97422999_100838999   | 3 |
| COX7A2   | 6_74875451_77396866    | 3 |
| CASP8AP2 | 6_90135121_91423459    | 3 |
| CDC40    | 6_109168061_112756362  | 3 |
| TJP2     | 9_70233709_71617302    | 3 |
| VLDLR    | 9_2559655_2952417      | 3 |
| EEF1A1   | 6_74266790_74286512    | 3 |
| TCF7L2   | 10_114129886_115474189 | 3 |
| BCKDHB   | 6_79436179_81341225    | 3 |
| KATNA1   | 6_149315857_149992906  | 3 |
| ANKRD6   | 6_90135121_91423459    | 3 |
| GABRR2   | 6_89266711_90133403    | 3 |
| SOBP     | 6_107556334_108718558  | 3 |
| C9orf82  | 9_26297529_27664431    | 3 |
| TEK      | 9_26297529_27664431    | 3 |
| TRAF3IP2 | 6_109168061_112756362  | 3 |
| KLF9     | 9_71621900_72807090    | 3 |
| BCLAF1   | 6_136317780_136692186  | 3 |
| SYNE1    | 6_152461219_152577227  | 3 |
| ABLIM1   | 10_115676858_116409310 | 3 |
| AKAP2    | 9_110686804_112024713  | 2 |
| FBXW2    | 9_122162008_124248881  | 2 |
| RRAGA    | 9_18979696_19197364    | 2 |
| PLAGL1   | 6_144123302_144707049  | 2 |
| ENPP1    | 6_131763569_132304683  | 2 |
| UGCG     | 9_113597296_113747728  | 2 |
| MTO1     | 6_73918251_74266789    | 2 |
| LOH3CR2A | 3_8440869_9285534      | 2 |
| EZR      | 6_158518568_159302317  | 2 |

|          |                       |   |
|----------|-----------------------|---|
| SEC61B   | 9_100899897_101056711 | 2 |
| SMAP1    | 6_70796754_71812194   | 2 |
| KIAA1009 | 6_84017058_84994248   | 2 |
| HDDC2    | 6_124730454_126264765 | 2 |
| VPS13A   | 9_78471939_79873671   | 2 |
| PNRC1    | 6_89266711_90133403   | 2 |
| CCDC28A  | 6_138842339_139665700 | 2 |
| KIAA1797 | 9_20454928_20801420   | 2 |
| TMEM38B  | 9_106593345_107511705 | 2 |
| GTF2H5   | 6_158508690_158518567 | 2 |
| PCMT1    | 6_150013780_151967069 | 2 |
| RPS6     | 9_19280143_19432557   | 2 |
| SMPDL3A  | 6_121484855_124378649 | 2 |
| TSPYL4   | 6_114391946_117317093 | 2 |
| SRGAP3   | 3_8440869_9285534     | 2 |

---



**Table S10. Genes determined to be gained and overexpressed specifically in the H2 tumors**

| Gene     | Segment               | Expression fold change |
|----------|-----------------------|------------------------|
| HAVCR1   | 5_153318241_156728896 | 90                     |
| EPB41L4A | 5_111505154_111922638 | 84                     |
| ELL2     | 5_95185578_96572060   | 80                     |
| RAPGEF6  | 5_130783666_130814765 | 60                     |
| C5orf13  | 5_109028224_111491735 | 56                     |
| YTHDC2   | 5_112703850_113188388 | 52                     |
| PRRC1    | 5_126472912_127898523 | 52                     |
| POLR3G   | 5_89715117_90038886   | 51                     |
| ERAP1    | 5_95185578_96572060   | 50                     |
| ST8SIA4  | 5_99896738_100307187  | 47                     |
| LOX      | 5_121379525_121463477 | 45                     |
| AFF4     | 5_132093779_133869573 | 41                     |
| RHEB     | 7_150769315_150816588 | 38                     |
| APC      | 5_111922639_112678649 | 33                     |
| ZCCHC10  | 5_132093779_133869573 | 31                     |
| SLC36A1  | 5_150387976_151495148 | 31                     |
| G3BP1    | 5_150387976_151495148 | 25                     |
| HSPA4    | 5_132093779_133869573 | 24                     |
| LRRTM2   | 5_137965436_142619254 | 23                     |
| PKD2L2   | 5_137033572_137695243 | 23                     |
| CNOT8    | 5_153318241_156728896 | 22                     |
| FBXO38   | 5_147704279_148125330 | 21                     |
| FEM1C    | 5_114787094_117418456 | 20                     |
| PGGT1B   | 5_113972101_114787065 | 17                     |
| FABP6    | 5_158186648_159550735 | 17                     |
| ANKHD1   | 5_137965436_142619254 | 15                     |
| TMCO6    | 5_137965436_142619254 | 15                     |
| XRCC2    | 7_151748390_155325075 | 14                     |
| NPY6R    | 5_137033572_137695243 | 13                     |
| CETN3    | 5_89715117_90038886   | 12                     |
| CSNK1A1  | 5_148125331_149600863 | 12                     |
| HSPA9    | 5_137741660_137923116 | 11                     |
| SLC12A2  | 5_126472912_127898523 | 11                     |
| SEMA6A   | 5_114787094_117418456 | 10                     |
| DMXL1    | 5_117428678_119347308 | 9                      |
| MEF2C    | 5_85233946_88114765   | 9                      |
| TMED7    | 5_114787094_117418456 | 9                      |
| NR3C1    | 5_142619255_142995861 | 9                      |
| SMAD5    | 5_133869574_135609557 | 9                      |
| MCTP1    | 5_93800373_94108870   | 9                      |
| SAP30L   | 5_153318241_156728896 | 8                      |
| MFAP3    | 5_153318241_156728896 | 8                      |
| TGFBI    | 5_133869574_135609557 | 8                      |
| SNX2     | 5_121463478_122532464 | 8                      |

|          |                       |   |
|----------|-----------------------|---|
| IK       | 5_137965436_142619254 | 8 |
| MYOT     | 5_137033572_137695243 | 7 |
| DNAJB6   | 7_155325076_158821424 | 7 |
| FBN2     | 5_126472912_127898523 | 6 |
| HSD17B4  | 5_117428678_119347308 | 6 |
| WDR60    | 7_155325076_158821424 | 6 |
| C5orf15  | 5_132093779_133869573 | 6 |
| UBE2D2   | 5_137965436_142619254 | 6 |
| GABRA1   | 5_160850531_161385662 | 6 |
| RHOBTB3  | 5_94108871_95185577   | 6 |
| TCERG1   | 5_145777678_145959815 | 5 |
| ARHGAP26 | 5_137965436_142619254 | 5 |
| VDAC1    | 5_132093779_133869573 | 5 |
| GM2A     | 5_150387976_151495148 | 5 |
| ATG12    | 5_114787094_117418456 | 5 |
| BRD8     | 5_137033572_137695243 | 5 |
| SPRY4    | 5_137965436_142619254 | 5 |
| ERAP2    | 5_95185578_96572060   | 5 |
| RBM22    | 5_149608837_150339149 | 5 |
| KIF3A    | 5_131895601_132064150 | 5 |
| SLCO4C1  | 5_100368305_103112032 | 5 |
| SNX24    | 5_121463478_122532464 | 4 |
| TTC37    | 5_94108871_95185577   | 4 |
| PRKAG2   | 7_150880365_151624640 | 4 |
| YIPF5    | 5_142995862_144127403 | 4 |
| THG1L    | 5_156728897_158181852 | 4 |
| LECT2    | 5_133869574_135609557 | 4 |
| INSIG1   | 7_151748390_155325075 | 4 |
| MED7     | 5_153318241_156728896 | 4 |
| CAST     | 5_95185578_96572060   | 4 |
| CSNK1G3  | 5_122532465_123412098 | 4 |
| ABLIM3   | 5_148125331_149600863 | 4 |
| SKP1     | 5_132093779_133869573 | 3 |
| ABCF2    | 7_150298143_150766389 | 3 |
| GIN1     | 5_100368305_103112032 | 3 |
| CHD1     | 5_98143728_99896737   | 3 |
| SRP19    | 5_111922639_112678649 | 3 |
| UBE2B    | 5_132093779_133869573 | 3 |
| NCAPG2   | 7_155325076_158821424 | 3 |
| PPIC     | 5_121463478_122532464 | 3 |
| ADAM19   | 5_156728897_158181852 | 3 |
| LNPEP    | 5_95185578_96572060   | 3 |
| HARS2    | 5_137965436_142619254 | 3 |
| RNF14    | 5_137965436_142619254 | 3 |
| SAR1B    | 5_133869574_135609557 | 3 |
| SYNPO    | 5_149608837_150339149 | 3 |
| ALDH7A1  | 5_124312152_126219449 | 3 |

|          |                       |   |
|----------|-----------------------|---|
| PURA     | 5_137965436_142619254 | 3 |
| PCDHGB6  | 5_137965436_142619254 | 3 |
| CTNNA1   | 5_137965436_142619254 | 3 |
| PCDHGB5  | 5_137965436_142619254 | 3 |
| C5orf4   | 5_153318241_156728896 | 3 |
| TCOF1    | 5_149608837_150339149 | 3 |
| FAM172A  | 5_92130734_93021232   | 3 |
| HNRNPA0  | 5_137033572_137695243 | 3 |
| FLJ11235 | 5_111505154_111922638 | 3 |
| CD74     | 5_149608837_150339149 | 3 |
| TNFAIP8  | 5_117428678_119347308 | 3 |
| SPINK5   | 5_146792840_147620910 | 3 |
| CCNJL    | 5_159560586_159794152 | 3 |
| GRAMD3   | 5_124312152_126219449 | 3 |
| FAM114A2 | 5_153318241_156728896 | 2 |
| CDKL3    | 5_132093779_133869573 | 2 |
| RASA1    | 5_85233946_88114765   | 2 |
| SPARC    | 5_150387976_151495148 | 2 |
| COMMD10  | 5_114787094_117418456 | 2 |
| PTTG1    | 5_159560586_159794152 | 2 |
| SLC22A5  | 5_131643865_131833633 | 2 |
| SNCAIP   | 5_121463478_122532464 | 2 |
| FER      | 5_107885704_108507649 | 2 |
| LMNB1    | 5_124312152_126219449 | 2 |
| GNB2L1   | 5_179412778_180857866 | 2 |
| PAXIP1   | 7_151748390_155325075 | 2 |
| PCDHGA8  | 5_137965436_142619254 | 2 |
| GALNT11  | 7_150880365_151624640 | 2 |
| GALNT10  | 5_153318241_156728896 | 2 |
| SGCD     | 5_153318241_156728896 | 2 |

**Table S11. Genes determined to be lost and underexpressed specifically in the H2 tumors**

| Gene      | Segment              | Expression fold change |
|-----------|----------------------|------------------------|
| ALDH6A1   | 14_73538366_75214580 | 273                    |
| FOS       | 14_73538366_75214580 | 41                     |
| ACOT1     | 14_72413330_73197695 | 24                     |
| C14orf1   | 14_73538366_75214580 | 15                     |
| WBSCR16   | 7_73758950_74127824  | 15                     |
| TMEM30B   | 14_60386017_61188235 | 14                     |
| MTHFD1    | 14_63745851_64141947 | 14                     |
| HSPA2     | 14_63745851_64141947 | 13                     |
| PNN       | 14_38425213_39179815 | 12                     |
| CNIH      | 14_53873515_54481493 | 12                     |
| C14orf45  | 14_73538366_75214580 | 12                     |
| KIAA0391  | 14_34641402_35194085 | 11                     |
| DLST      | 14_73538366_75214580 | 11                     |
| PLEKHG3   | 14_64141948_64362422 | 11                     |
| ACTR10    | 14_57676004_58185200 | 10                     |
| ARG2      | 14_66925080_67888728 | 10                     |
| RAB15     | 14_64373004_64780332 | 10                     |
| GSTZ1     | 14_75364277_77059690 | 10                     |
| PRKCH     | 14_60386017_61188235 | 10                     |
| AHSA1     | 14_75364277_77059690 | 9                      |
| RDH11     | 14_66925080_67888728 | 9                      |
| COX16     | 14_68301617_69955784 | 8                      |
| NFKBIA    | 14_34641402_35194085 | 8                      |
| PSEN1     | 14_72413330_73197695 | 7                      |
| ANGEL1    | 14_75364277_77059690 | 7                      |
| ZNF410    | 14_73238184_73538365 | 7                      |
| TMED10    | 14_73538366_75214580 | 7                      |
| KLHDC2    | 14_49275523_49764448 | 7                      |
| KTN1      | 14_55049506_57672302 | 7                      |
| ACTN1     | 14_68301617_69955784 | 7                      |
| C14orf101 | 14_55049506_57672302 | 6                      |
| ERH       | 14_68301617_69955784 | 6                      |
| SFRS5     | 14_68301617_69955784 | 6                      |
| SYNE2     | 14_62827859_63745850 | 6                      |
| GPC5      | 13_90843580_90863093 | 6                      |
| RPS29     | 14_48594272_49275522 | 6                      |
| MUDENG    | 14_55049506_57672302 | 6                      |
| ATP6V1D   | 14_66874128_66925079 | 6                      |
| FAM179B   | 14_43988150_44610615 | 5                      |
| VTI1B     | 14_66925080_67888728 | 5                      |
| PNMA1     | 14_73238184_73538365 | 5                      |
| DHRS7     | 14_59453438_60386016 | 5                      |
| ALKBH1    | 14_77059691_77387656 | 5                      |
| KIAA0317  | 14_73538366_75214580 | 5                      |

|           |                      |   |
|-----------|----------------------|---|
| ARF6      | 14_49275523_49764448 | 4 |
| NPC2      | 14_73538366_75214580 | 4 |
| ARHGAP5   | 14_31415386_32765672 | 4 |
| YLPM1     | 14_73538366_75214580 | 4 |
| PIGH      | 14_66925080_67888728 | 4 |
| SEL1L     | 14_79355997_81577951 | 4 |
| FBXO34    | 14_54579863_55048577 | 4 |
| GPHN      | 14_65941325_66596885 | 3 |
| SAMD4A    | 14_53873515_54481493 | 3 |
| FLRT2     | 14_84926602_85186475 | 3 |
| STRN3     | 14_30349237_31352314 | 3 |
| UBA7      | 3_49220649_53001753  | 3 |
| C14orf169 | 14_72413330_73197695 | 3 |
| WBP11     | 12_14813007_14834182 | 3 |
| PPM1A     | 14_59453438_60386016 | 3 |
| C14orf147 | 14_32812162_34288375 | 3 |
| EAPP      | 14_32812162_34288375 | 3 |
| MAX       | 14_64373004_64780332 | 3 |
| EIF2B2    | 14_73538366_75214580 | 3 |
| ABCD4     | 14_73538366_75214580 | 3 |
| LTF       | 3_44897145_49188640  | 3 |
| LSM3      | 3_12915346_14322584  | 2 |
| MAP4      | 3_44897145_49188640  | 2 |
| GNAI2     | 3_49220649_53001753  | 2 |
| L2HGDH    | 14_49764449_50156136 | 2 |
| SEC13     | 3_9737595_11040806   | 2 |
| MAPK1IP1L | 14_54579863_55048577 | 2 |
| GCH1      | 14_53873515_54481493 | 2 |
| LMCD1     | 3_8440869_9285534    | 2 |
| RPP14     | 3_58186123_58682005  | 2 |
| QRICH1    | 3_44897145_49188640  | 2 |
| EIF2S1    | 14_66874128_66925079 | 2 |
| ARIH2     | 3_44897145_49188640  | 2 |
| IQSEC1    | 3_12903762_12915345  | 2 |
| BRPF1     | 3_9737595_11040806   | 2 |
